1 **Tankyrase-mediated ADP-ribosylation is a novel regulator of TNF-induced**  
2 **death**

3  
4 Lin Liu<sup>1,2</sup>, Jarrod J. Sandow<sup>1,2</sup>, Deena M. Leslie Pedrioli<sup>3</sup>, Natasha Silke<sup>1</sup>, Zhaoqing Hu<sup>1</sup>, Emma  
5 Morrish<sup>1,2</sup>, Diep Chau<sup>1</sup>, Tobias Kratina<sup>1</sup>, Andrew J. Kueh<sup>1,2</sup>, Michael O. Hottiger<sup>3</sup>, Andrew I.  
6 Webb<sup>1,2</sup>, Najoua Lalaoui<sup>1,2,4\*</sup> & John Silke<sup>1,2,4\*</sup>

7  
8 <sup>1</sup> The Walter and Eliza Hall Institute of Medical Research, Parkville, VIC 3052, Australia

9 <sup>2</sup> Department of Medical Biology, University of Melbourne, Parkville, VIC 3010, Australia

10 <sup>3</sup> Department of Molecular Mechanisms of Disease (DMMD), University of Zurich, 8057 Zurich,  
11 Switzerland;

12 <sup>4</sup> These authors jointly supervised this work: Najoua Lalaoui, John Silke.

13 \*e-mail: [lalaoui@wehi.edu.au](mailto:lalaoui@wehi.edu.au); [silke@wehi.edu.au](mailto:silke@wehi.edu.au)

14  
15 **ABSTRACT**

16  
17 **Tumor necrosis factor (TNF) is an inflammatory cytokine that, upon binding to its receptor**  
18 **TNFR1, can drive cytokine production, cell survival, or cell death and is a major component**  
19 **of an organism's anti-pathogen repertoire<sup>1,2</sup>. TNF stimulation leads to the formation of two**  
20 **distinct signalling complexes, a well-defined membrane bound complex (complex 1), and a less**  
21 **well characterised cytosolic death inducing complex (complex 2). Using mass spectrometry,**  
22 **we identified the ADP-ribosyltransferase, tankyrase-1 (TNKS1/TNKS/ARTD5/PARP5a) as a**  
23 **novel native complex 2 component. Following a TNF-induced death stimulus TNKS1**  
24 **is recruited to complex 2, resulting in complex 2 poly(ADP-ribosylation) (PARylation).**  
25 **Tankyrase inhibitors sensitise cells to TNF-induced death, which is correlated with increased**  
26 **complex 2 assembly. Tankyrase-mediated PARylation promotes recruitment of the E3 ligase**  
27 **RNF146 and RNF146 deficiency or proteasome inhibition results in increased levels of**  
28 **complex 2, suggesting that RNF146 causes proteasomal degradation of complex 2. Several**  
29 **viruses express ADP-ribose binding macrodomain proteins, and expression of the SARS-CoV-**  
30 **2 or VEEV macrodomain markedly sensitises cells to TNF-induced death. This suggests that**  
31 **ADP-ribosylation serves as yet another mechanism to detect pathogenic interference of TNF**  
32 **signalling and retaliate with an inflammatory cell death (187 words).**

33  
34

35 Tumor necrosis factor (TNF)/TNFR1 signalling helps coordinate an anti-pathogen response by  
36 promoting transcriptional upregulation and secretion of other cytokines and inflammatory mediators  
37 <sup>3-17</sup>. To counter this, pathogens have evolved mechanisms to disrupt signalling from the membrane  
38 bound complex 1 that nucleates around TNFR1 <sup>2,18</sup>. This in turn has prompted an evolutionary arms  
39 race whereby disruption of the transcriptional response can provoke TNF-induced cell death via a  
40 secondary cytosolic complex 2, containing RIPK1, FADD and caspase-8 <sup>3,5,16,19-32</sup>. Dysregulation of  
41 TNF signalling has been implicated in a diverse range of inflammatory and auto-immune diseases  
42 <sup>33-35</sup>, stimulating research that has generated a detailed understanding of complex 1 and the  
43 TNF/TNFR1 transcriptional response. Compelling evidence showing that TNF-induced cell death is  
44 also pathogenic has stimulated the development of drugs to block the cell death response <sup>16,35-37</sup>, but  
45 a correspondingly detailed insight into the composition and regulation of complex 2 is lacking.

46

#### 47 **Tankyrase-1 is a novel component of TNFR1 complex 2**

48 To identify TNFR1 complex 2 components, we generated and validated both N- and C- terminally  
49 3x FLAG tagged murine caspase-8 constructs (**Extended Data Fig. 1a-c**). These tagged constructs  
50 allowed us to immunoprecipitate caspase-8 with a number of controls that increase the chance of  
51 identifying true hits. Complex 2 formation was induced by treating cells with TNF (T), Smac-  
52 mimetic (S) to impair the transcriptional response and the pan-caspase inhibitor emricasan/IDN-  
53 6556 (I) to stabilise complex 2 <sup>38-40</sup>. As expected, mass spectrometry analysis of the caspase-8  
54 C3FLAG immunoprecipitate from TSI treated Mouse Dermal Fibroblasts (MDFs) revealed  
55 enrichment of known complex 2 components, including RIPK1, RIPK3, A20, TRADD and FADD  
56 (**Fig. 1a; Supplementary Data 1, sheet 1**). We also identified a previously unreported complex 2  
57 protein, tankyrase-1 (TNKS/TNKS1/ARTD5/PARP5a) (**Fig. 1a; Supplementary Data 1, sheet 1**).  
58 TNKS1 is an ADP-ribosyltransferase of the ARTD family <sup>41,42</sup> (**Extended Data Fig. 1d**), and has  
59 not previously been implicated in regulating TNF-induced cell death. To explore the physiological  
60 significance of this finding we generated both N- and C- terminally 3x FLAG tagged caspase-8  
61 (*Casp8*<sup>N3FLAG</sup> and *Casp8*<sup>C3FLAG</sup>) knock-in mice using CRISPR/Cas9 technology (**Extended Data**  
62 **Fig. 1e-f**). Bone marrow derived macrophages (BMDMs) and MDFs generated from heterozygote  
63 knock-in mice were treated with TSI and caspase-8 was immunoprecipitated ± FLAG peptide  
64 spiking. As expected, cleaved caspase-8, FADD and RIPK1 were immunoprecipitated together with  
65 caspase-8 upon TSI from both *Casp8*<sup>+N3FLAG</sup> and *Casp8*<sup>+C3FLAG</sup> cells although we precipitated  
66 slightly more of these proteins from *Casp8*<sup>+C3FLAG</sup> cells (**Fig. 1b, Extended Data Fig. 1g**).  
67 Consistently we also observed higher levels of TNKS1 co-precipitating with caspase-8 C3FLAG  
68 (**Fig. 1b, Extended Data Fig. 1g**). In contrast, we did not observe PARP1/ARTD1, the most widely

69 studied ARTD family member, co-precipitating with caspase-8 after TSI stimulation, suggesting  
70 that the association of TNKS1 with complex 2 was specific (**Extended Data Fig. 1h**).

71

72 To further validate these results, we immunoprecipitated endogenous RIPK1 (**Fig. 1c, Extended**  
73 **Data Fig. 1i-j**), FADD (**Extended Data Fig. 1j**) and cleaved caspase-8 (**Fig. 1d, Extended Data**  
74 **Fig. 1i**) from wild-type (WT) BMDMs, MDFs and Mouse Embryonic Fibroblasts (MEFs) and  
75 likewise observed TNKS1 co-precipitating with these proteins only when the cells were treated with  
76 TSI. Finally, endogenous tankyrases immunoprecipitated FADD, RIPK1 and cleaved caspase-8  
77 from WT BMDMs and MEFs treated with TSI (**Fig. 1d, Extended Data Fig. 1i**). TNKS1 also  
78 immunoprecipitated with RIPK1, caspase-8 and FADD following TSI treatment of human HT1080  
79 and HT29 cells (**Extended Data Fig. 1k-l**).

80

81 Inhibition of protein translation with cycloheximide (CHX) sensitises cells to TNF. TNF+CHX-  
82 induced cell death, in contrast to TS-induced death, does not require RIPK1<sup>3,19,43-45</sup>. Interestingly,  
83 we did not observe the recruitment of TNKS1 to complex 2 after TNF+CHX treatment (**Extended**  
84 **Data Fig. 1m**), suggesting that the different types of cell death are caused by different types of  
85 complex 2. Moreover, unlike cIAPs and RIPK1, we did not detect TNKS1 in complex 1 (**Extended**  
86 **Data Fig. 1n**), implying that TNKS1 is specifically recruited together with caspase-8 or FADD to  
87 complex 2.

88

### 89 **Complex 2 is PARylated**

90 Tankyrases catalyse the formation of poly-ADP ribose (PAR) chains on their substrates<sup>41,46</sup>. To  
91 determine whether complex 2 becomes PARylated we treated WT BMDMs with TSI ± the  
92 tankyrase inhibitor, IWR-1<sup>47,48</sup> and immunoprecipitated PAR chains with an anti-PAR antibody  
93 (**Fig. 2a**). Modified RIPK1, indicative of ongoing TNF signalling, precipitated with anti-PAR and  
94 was slightly reduced in the presence of IWR-1. Intriguingly, however, cleaved caspase-8 was only  
95 immunoprecipitated by the anti-PAR antibody in the absence of the tankyrase inhibitor (**Fig. 2a**).

96

97 The WWE domain of the E3 ligase RNF146 recognizes the iso-ADP-ribose linkage between two  
98 ADP-ribose monomers in PAR chains<sup>49</sup>. We therefore generated a GST fusion of wild-type WWE  
99 or a single point mutant (R163A) that is unable to bind PAR chains<sup>50</sup> and precipitated lysates from  
100 WT BMDMs treated ± TSI ± IWR-1 or the PARP1/2 inhibitor olaparib<sup>51</sup> (**Fig. 2b**). Consistent with  
101 the anti-PAR immunoprecipitation result, GST-WWE precipitated FADD, modified RIPK1 and  
102 cleaved caspase-8 only from lysates of cells treated with TSI (**Fig. 2b**). Notably unmodified RIPK1

103 was purified using either the wild-type or the mutant WWE motif, suggesting that this interaction  
104 and that observed with anti-PAR (**Fig. 2a**) are non-specific and most likely due to the sepharose-  
105 beads. As expected TNKS1, PARP1 and PAR chains themselves were all precipitated by GST-  
106 WWE but not the GST-WWE R163A mutant in the presence or absence of TSI treatment (**Fig. 2b**).  
107 Olaparib treatment substantially reduced the amount of PARP1 and PAR chains precipitated from  
108 the lysate, however, consistent with the fact that, at the dose used here it does not inhibit tankyrases,  
109 it did not affect the ability of GST-WWE to purify FADD, modified RIPK1 and cleaved caspase-8  
110 (**Fig. 2b**). Conversely, IWR-1 treatment had little impact on the amount of PARP1 and PAR chains  
111 precipitated with GST-WWE but almost completely prevented precipitation of FADD, modified  
112 RIPK1 and cleaved caspase-8 (**Fig. 2b**). Notably, IWR-1 treatment increased the levels of cleaved  
113 caspase-8 in the TSI cell lysates when compared with DMSO control while simultaneously  
114 reducing the level of cleaved caspase-8 precipitated by GST-WWE, an effect that was also observed  
115 in MEFs (**Fig. 2c**) and MDFs (**Extended Data Fig. 2a**). The precipitation of FADD and modified  
116 RIPK1 by GST-WWE upon TSI treatment was completely abrogated by loss of *Casp8* (**Fig. 2c**). To  
117 exclude a potential off-target effect of the tankyrase inhibitor IWR-1, and to rule out the possibility  
118 that TNKS1 and TNKS2 may compensate for each other<sup>52</sup>, we depleted TNKS1 in MDFs derived  
119 from *Tnks2*<sup>-/-</sup> mice using a doxycycline (Dox)-induced TNKS1 short hairpin RNA (shRNA) and  
120 found that the combined absence of TNKS1 and TNKS2 significantly decreased the level of  
121 cleaved caspase-8 and modified RIPK1 pulled down with GST-WWE (**Extended Data Fig. 2b**). In  
122 contrast, overexpression of TNKS1 isoform 2 but not TNKS2, markedly increased the level of  
123 complex 2 components precipitated by GST-WWE (**Extended Data Fig. 2c**), indicating that  
124 TNKS1 plays a predominant role in complex 2 PARylation.

125

126 To confirm that at least one complex 2 component was PARylated we performed a FLAG  
127 immunoprecipitation from homozygous *Casp8*<sup>C3FLAG/C3FLAG</sup> BMDMs stimulated with TSI and then  
128 treated this ± poly-ADP ribose glycohydrolase (PARG), a dePARylating enzyme that cleaves  
129 conjugated ADP-ribose polymers<sup>53,54</sup> (**Fig. 2d**). GST-WWE was then used to sequentially purify  
130 PARylated proteins from the purified complex. Consistent with our previous results, FADD,  
131 modified RIPK1, TNKS1 and cleaved caspase-8 were precipitated following TSI treatment but only  
132 if PAR chains had not been removed by PARG treatment (**Fig. 2d**). A similar approach using the  
133 ADP-ribose binding macrodomain *Af1521* from *Archaeoglobus fulgidus*, which binds mono-ADP-  
134 ribose groups and the terminal ribose in PAR chains<sup>49</sup>, also sequentially precipitated FADD,  
135 modified RIPK1, TNKS1 and cleaved caspase-8 (**Extended Data Fig. 2d**).

136

137 WWE domains are found in many E3 ubiquitin ligases<sup>55</sup>, including HUWE1 and TRIP12. The  
138 critical residues for PAR binding are conserved in most WWE domains and HUWE1 and TRIP12  
139 WWE domains specifically interact with PAR chains<sup>56</sup>. To determine whether there might be some  
140 specificity to the complex 2 interaction, we performed a PAR pulldown assay using GST-HUWE1,  
141 -TRIP12 and -RNF146 WWE fusion proteins (**Extended Data Fig. 2e**). GST-RNF146 WWE was  
142 more efficient than GST-HUWE1 WWE which in turn was far more efficient than GST-TRIP12, at  
143 precipitating complex 2 components, suggesting that there may be some specificity and indicating  
144 that the RNF146 WWE is optimal for PARylated complex 2 purification (**Extended Data Fig. 2e**).

145

#### 146 **Tankyrases limit TNF-induced cell death**

147 Thus far, our data suggested that TNKS1 is a functional component of complex 2 and complex 2  
148 undergoes PARylation and also hinted that ADP-ribosylation might limit caspase-8 activation. To  
149 explore this further we treated WT BMDMs with increasing doses IWR-1 and measured TNF-  
150 induced cell death by flow cytometry. Consistent with our earlier Western blot analyses (**Fig. 2**),  
151 BMDMs were rendered increasingly sensitive to TNF plus Smac-mimetic-induced apoptosis (TS)  
152<sup>1,15,30,31,38,57,58</sup> and TSI-induced necroptosis<sup>34,59-70</sup> by increasing doses of IWR-1 (**Fig. 3a-b**). This  
153 sensitisation was reversed by inhibition of RIPK1 kinase activity with necrostatin-1s, suggesting  
154 that tankyrase inhibition sensitised cells to TNF-induced cell death in a RIPK1 kinase-dependent  
155 manner (**Fig. 3a-b**). Inhibition or depletion of tankyrases also sensitized MDFs to TS-induced death  
156 (**Extended Data Fig. 3a-b**), but consistent with the lack of TNKS1 in TNF+CHX-induced complex  
157 2 (**Extended Data Fig. 1m**), inhibition of tankyrases did not affect TNF+CHX-induced cell death  
158 (**Extended Data Fig. 3a**). Another tankyrase inhibitor, Az6102<sup>51</sup>, also increased sensitivity to  
159 TNF-induced death, while the PARP1/2 inhibitor, olaparib, did not (**Extended Data Fig. 3c**).  
160 Consistent with the increased cell death, increasing IWR-1 concentrations increased the levels of  
161 cleaved caspase-8 and caspase-3 (**Fig. 3c**) observed in TS treated BMDMs and phospho-RIPK3 and  
162 phospho-MLKL in TSI treated cells (**Fig. 3d**). The clinical Smac-mimetic birinapant kills leukemic  
163 cells in a TNF-dependent manner<sup>30,31,38</sup>, and consistent with this, and our previous data, MLL-  
164 AF9/NRas<sup>G12D</sup> cells were dramatically sensitised to both apoptotic and necroptotic cell death by  
165 increasing doses of IWR-1 (**Extended Data Fig. 3d**).

166

167 To determine why cells were more sensitive to TNF-induced cell death when tankyrase activity was  
168 inhibited we immunoprecipitated complex 2 from *Casp8*<sup>C3FLAG/C3FLAG</sup> BMDMs and MEFs treated  
169 with TSI ± IWR-1. By selecting a TSI dose that induced only low levels of caspase-8 activation, we  
170 were able to show that tankyrase inhibition dramatically increased the amount of complex 2 that

171 could be immunoprecipitated by anti-FLAG beads, suggesting that tankyrase-mediated ADP-  
172 ribosylation reduces the stability of complex 2 (**Fig. 3e, Extended Data Fig. 3e**). Typically,  
173 complex 2 is difficult to purify unless a caspase inhibitor, such as emricasan/IDN-6556, is used to  
174 stabilise it<sup>3,38</sup>. However, this makes it difficult to test whether tankyrase inhibition increases  
175 complex 2 formation in the absence of a caspase inhibitor. To circumvent this issue, we took  
176 advantage of the fact that complex 2 can be isolated more readily from cells expressing an  
177 uncleavable form of RIPK1<sup>71</sup>. We therefore treated *Ripk1*<sup>D325A/+</sup> heterozygous MDFs with TS ±  
178 IWR-1 and immunoprecipitated RIPK1 and found that tankyrase inhibition also increased the  
179 amount of complex 2 that could be purified from these cells and sensitised them to TNF-induced  
180 cell death in a dose dependent manner (**Fig. 3f-g, Extended Data Fig. 3f**).

181

### 182 **The tankyrase-RNF146 axis regulates the stability of complex 2 and TNF-induced death**

183 Tankyrases regulate a number of other signalling pathways<sup>48,72-75</sup>, and the most well-studied is the  
184 Wnt pathway where tankyrase-mediated ADP-ribosylation of Axin recruits the E3 ligase RNF146  
185 via its WWE motif. RNF146 then ubiquitylates Axin causing its recruitment to and degradation by  
186 the proteasome<sup>50,56,76-78</sup>. Given the increased stability of complex 2 in the presence of tankyrase  
187 inhibitor IWR-1 that we observed, we hypothesized that tankyrase-mediated ADP-ribosylation of  
188 complex 2 might function analogously to recruit RNF146 and promote its proteasomal degradation.  
189 In accord with this hypothesis RNF146 was recruited to complex 2 immunoprecipitated from  
190 *Casp8*<sup>+/-C3FLAG</sup> heterozygote MEFs treated with TSI (**Fig. 4a**). Furthermore, there was a reduction in  
191 the precipitation of ubiquitylated complex 2 components using a GST-UBA fusion protein, when  
192 cells were treated with IWR-1 (**Fig. 4b**). Consistent with the idea that proteasomal mediated  
193 degradation limits complex 2 levels, we observed a striking increase in the amount of ubiquitylated  
194 complex 2 when cells were treated with the proteasomal inhibitor MG132 (**Fig. 4c**). To avoid the  
195 possibility that constitutive loss of RNF146 affected cell viability, we generated stable Dox  
196 inducible RNF146 shRNA expressing cells and immunoprecipitated RIPK1 in the presence or  
197 absence of Dox. Similarly to the proteasome inhibitor experiment, we saw that there was a stark  
198 increase in the levels of complex 2 in the cells with reduced levels of RNF146 when compared with  
199 control shRNA expressing cells (**Fig. 4d**), and as expected shRNF146 expressing cells were more  
200 sensitive to TNF-induced cell death (**Fig. 4e, Extended Data Fig. 4**).

201

### 202 **Viral macrodomains sensitise TNF-induced death**

203 TNF is an important part of the mammalian anti-pathogen armamentarium and as a consequence is  
204 frequently targeted by pathogens which produce proteins that interfere with the pathway<sup>2</sup>. The TNF



205 pathway has however several mechanisms to respond to interference and one of those is to trigger  
206 cell death. This begs the question whether ADP-ribosylation of complex 2 also serves to control for  
207 interference and whether the increased death that we observed when tankyrase activity is inhibited  
208 might mimic some form of pathogen manipulation. A number of viruses, including Coronaviruses,  
209 express evolutionarily conserved MacroD type macrodomains<sup>79,80</sup>, similar to that of *Af1521* that we  
210 used to precipitate complex 2, that are able to bind to mono-ADP-ribosylated proteins or to the end  
211 of poly-ADP-Ribose chains and in some cases have been shown to remove ADP-ribose from mono-  
212 ADP-ribosylated proteins<sup>81-85</sup>. We therefore asked whether inducible expression of the  
213 macrodomain from SARS-CoV-2 or a closely related VEEV macrodomain might affect TNF-  
214 induced cell death. Consistent with the idea that ADP-ribosylation of complex 2 could serve as a  
215 checkpoint to detect perturbations in TNF signalling we found that expression of both these viral  
216 macrodomains markedly increased the sensitivity of cells to TNF-induced cell death (**Fig. 5**).

217

218 We show that the ability of TNF to induce cell death is regulated by tankyrase-mediated  
219 PARylation. Interestingly, while TNKS1 was readily recruited to complex 2 upon Smac-mimetic  
220 treatment, it was not detectable in complex 2 assembled in response to cycloheximide. This  
221 suggests that ADP-ribosylation is a context sensitive regulator and since RIPK1 involvement is a  
222 major difference in these two complexes, it suggests RIPK1 might be directly involved.

223

224 Tankyrase 1 & 2 regulate a number of signalling pathways and one possibility is that the  
225 PARylation-mediated by tankyrases might allow different signalling pathways to interact and co-  
226 ordinate with one another. In particular there is evidence linking TNF signalling with the Wnt and  
227 GSK3 signalling pathways as well as cell cycle and cell division, all of which are known to be  
228 regulated by tankyrases<sup>46,86,87</sup>. Indeed, specific and potent tankyrase inhibitors, such as IWR-1,  
229 were developed to block Wnt signalling in cancers yet clearly sensitise cells to TNF killing and this  
230 unintended activity might increase the efficacy of these drugs in tumors with an inflammatory  
231 component. Furthermore, it has been noted that some cancers are sensitive to these inhibitors  
232 without apparently affecting Wnt signalling thus opening up the possibility that sensitivity to TNF  
233 might be an additional predictive biomarker to consider when using these drugs.

234

235 Despite its defensive intent, excessive TNF-induced cell death can cause serious pathology, and  
236 SARS-CoV-2 infection triggers caspase-8 activation and apoptosis in mice and the postmortem  
237 lung sections of COVID-19 patients also contain markers of extrinsic TNF-induced apoptosis<sup>88,89</sup>.  
238 Viral macrodomains have been shown to either bind to or hydrolyse ADP-ribose<sup>81,85</sup>, and since

239 inducible expression of the macrodomains of SARS-CoV-2 and VEEV sensitised cells to TNF-  
240 induced cell death, this suggests that ADP-ribosylation may serve as yet another mechanism to  
241 allow TNF to retaliate against a dangerous infection by inducing cell death. This idea is supported  
242 by the observation that PARP-10, a mono-ADP-ribosyltransferase, inhibits IL-1 $\beta$ /TNF-induced NF-  
243  $\kappa$ B signalling<sup>90</sup>. Given the broad involvement of ADP-ribosylation in other signalling pathways<sup>91,92</sup>,  
244 one intriguing possibility is that pathogens select for the ability to interfere with ADP-ribosylation  
245 to target these pathways and that ADP-ribosylation has been co-opted into the TNF response to  
246 control for the integrity of these pathways rather than of the TNF pathway alone.



247 **FIGURE LEGENDS**

248

249 **Fig. 1 | Tankyrase-1 is a novel interactor of native TNFR1 complex 2**

250

251 **a**, Log2 fold change volcano plots of protein enrichment upon TSI stimulation in *Casp8<sup>-/-</sup>.Mik1<sup>-/-</sup>*  
252 MDFs expressing caspase-8 C3FLAG compared to the untreated control. Proteins were first filtered  
253 by requiring a P Value < 0.05 in a pairwise comparison between the caspase-8 C3FLAG and tagless  
254 caspase-8 negative control in either the untreated or TSI treated samples. Known constituents of the  
255 native TNFR1 complex 2 (RIPK1, RIPK3, FADD, TRADD and A20) are labelled and highlighted  
256 in green while TNKS1 (TNKS) is highlighted in red. P Values calculated using Limma (n = 5).

257

258 **b**, TNF-induced complex 2 immunoprecipitation using anti-FLAG M2 affinity beads. Western blot  
259 analysis of complex 2 and lysates from *Casp8<sup>+/+</sup>*, *Casp8<sup>+/N3FLAG</sup>* and *Casp8<sup>+/C3FLAG</sup>* BMDMs using  
260 the indicated antibodies is shown. Cells were treated with TNF (100 ng/mL) + Smac-mimetic  
261 compound A (500 nM) + caspase inhibitor IDN-6556 (5  $\mu$ M)(TSI) for 1.5 hours before lysis and  
262 anti-FLAG immunoprecipitation. FLAG spiked controls contained 3xFLAG peptides at a final  
263 concentration of 50  $\mu$ g/mL. Caspase inhibitor was used to stabilize complex 2.

264

265 **c-d**, TNF-induced complex 2 immunoprecipitation. Wild-type (WT) BMDMs were treated with TSI  
266 (as in **b**) to induce complex 2 assembly. Lysates were immunoprecipitated with anti-RIPK1 (**c**) or  
267 anti-cleaved caspase-8 or anti-tankyrase (**d**), separated on SDS/PAGE gels and probed with the  
268 indicated antibodies.

269

270 Filled arrowheads alone denote bands between 100 kDa and 150 kDa detected by anti-tankyrase  
271 which might indicate TNKS1 isoform 2 (106 kDa) or TNKS2 (127 kDa). For detailed domain  
272 information, see Extended Data Fig. 1d. \*indicate IgG chains. Blots are representative of two to  
273 three independent experiments.

274

275 **Fig. 2 | Complex 2 is PARylated**

276

277 **a**, TNF-induced complex 2 immunoprecipitation using anti-PAR (Trevigen 4335-MC-100).  
278 Western blot analysis of complex 2 and lysates from WT BMDMs using the indicated antibodies is  
279 shown. Cells were treated with TSI as in Fig. 1  $\pm$  tankyrase inhibitor IWR-1 (5  $\mu$ M) for 1.5 hours  
280 before being subjected to anti-PAR immunoprecipitation.

281

282 **b**, GST-WWE and GST-WWE<sup>R163A</sup> pulldown of TNF-induced complex 2 from WT BMDMs  
283 lysates. Cells were treated with TNF (10 ng/mL) + Smac-mimetic (250 nM) + caspase inhibitor (5  
284  $\mu$ M) (TSI)  $\pm$  tankyrase inhibitor IWR-1 (5  $\mu$ M) or  $\pm$  PARP1/2 inhibitor olaparib (1 $\mu$ M) for 1.5  
285 hours. Western blot analysis of complex 2 and lysates using the indicated antibodies is shown.

286  
287 **c**, GST-WWE pulldown of TNF-induced complex 2 from *Casp8*<sup>+/+</sup> or *Casp8*<sup>-/-</sup> MEFs lysates. Cells  
288 were treated with TSI (as in **a**) ± IWR-1 (10 μM). Western blot analysis of complex 2 and lysates  
289 using the indicated antibodies is shown.

290  
291 **d**, Enrichment of PARylated complex 2 using GST-WWE in a sequential pulldown analysis.  
292 *Casp8*<sup>C3FLAG/C3FLAG</sup> BMDMs were treated with TSI (as in **a**) and complex 2 was  
293 immunoprecipitated using anti-FLAG M2 affinity beads. Immunoprecipitants were eluted with 3x  
294 FLAG peptides followed by ± PARG treatment at 37°C for 3 hours before being subjected to GST-  
295 WWE pulldown. Western blot analysis of lysates and sequential pulldown using the indicated  
296 antibodies is shown.

297  
298 Filled arrowheads alone indicate potential tankyrase species. Empty arrowheads alone denote  
299 unmodified RIPK1 that is purified non-specifically by either Sepharose anti-PAR (**a**) or Sepharose  
300 GST-WWE (**b-c**). \*indicate IgG chains. Blots are representative of two to three independent  
301 experiments.

302

### 303 **Fig. 3 | Tankyrases limit TNF-induced cell death**

304

305 **a**, Level of cell death assessed by propidium iodide (PI) positive cells. WT BMDMs were treated  
306 with TNF (10 ng/mL) + Smac-mimetic (500 nM) (TS) ± IWR-1 (250nM, 500nM, 1 μM, 2 μM, 5  
307 μM) ± Nec-1s (10 μM) for 24 hours. Graphs show mean ± SEM, n=3 biologically independent  
308 repeats. Comparisons were performed with a Student's t test whose values are denoted as \*p ≤ 0.05,  
309 \*\*\*p ≤ 0.001 and \*\*\*\*p ≤ 0.0001.

310

311 **b**, Level of cell death assessed by PI positive cells. WT BMDMs were treated with TNF (10 ng/mL)  
312 + Smac-mimetic (10 nM) + caspase inhibitor (5 μM) (TSI) ± IWR-1 (250nM, 500nM, 1 μM, 2 μM,  
313 5 μM) ± Nec-1s (10 μM) for 16 hours. Graphs show mean ± SEM, n=3 biologically independent  
314 repeats. Comparisons were performed with a Student's t test whose values are denoted as \*p ≤ 0.05,  
315 \*\*p ≤ 0.01 and \*\*\*\*p ≤ 0.0001.

316

317 **c**, Western blot analysis of cell lysates from WT BMDMs using indicated antibodies is shown.  
318 Cells were treated with TNF (10 ng/mL) + Smac-mimetic (500 nM) (TS) ± IWR-1 (250nM,  
319 500nM, 1 μM, 2 μM, 5 μM) for 8 hours.

320

321 **d**, Western blot analysis of cell lysates from WT BMDMs using indicated antibodies is shown.  
322 Cells were treated with TNF (10 ng/mL) + Smac-mimetic (20 nM) + caspase inhibitor (5 μM)  
323 (TSI) ± IWR-1 (250nM, 500nM, 1 μM, 2 μM, 5 μM) for 8 hours.

324

325 **e**, TNF-induced complex 2 immunoprecipitation using anti-FLAG M2 affinity beads. Western blot  
326 analysis of complex 2 and lysates from *Casp8*<sup>C3FLAG/C3FLAG</sup> BMDMs using the indicated antibodies  
327 is shown. Cells were treated with TNF (10 ng/mL) + Smac-mimetic (50 nM) + caspase inhibitor (5  
328  $\mu$ M) (TSI)  $\pm$  IWR-1 (5  $\mu$ M) for 1.5 hours before being subjected to anti-FLAG  
329 immunoprecipitation.

330  
331 **f**, TNF-induced complex 2 immunoprecipitation using anti-RIPK1 antibody. Western blot analysis  
332 of complex 2 and lysates from *Ripk1*<sup>D325A/+</sup> heterozygous MDFs using the indicated antibodies is  
333 shown. Cells were treated with TNF (50 ng/mL) + Smac-mimetic (100 nM)  $\pm$  IWR-1 (5  $\mu$ M) for 2  
334 hours before being subjected to anti-RIPK1 immunoprecipitation.

335  
336 **g**, Cell death monitored by time-lapse imaging of PI staining over 16 hours using IncuCyte.  
337 *Ripk1*<sup>D325A/+</sup> heterozygote MDFs were treated with TNF (50 ng/mL) + Smac-mimetic (25 nM) (TS)  
338  $\pm$  IWR-1 (250nM, 500nM, 1  $\mu$ M, 2  $\mu$ M) for 16 hours. Dashed lines denote the PI count without  
339 IWR-1 treatment for reference. Results from two additional, biologically independent MDFs are  
340 shown in Extended Data Fig. 3f.

341  
342 Filled arrowheads alone indicate potential tankyrase species. \*indicate IgG chains. Blots are  
343 representative of two to three independent experiments.

344

345 **Fig. 4 | The tankyrase-RNF146 axis regulates the stability of complex 2 and TNF-induced**  
346 **death**

347  
348 **a**, TNF-induced complex 2 immunoprecipitation using anti-FLAG M2 affinity beads. Western blot  
349 analysis of complex 2 and lysates from *Casp8*<sup>+C3FLAG</sup> MEFs using the indicated antibodies is  
350 shown. Cells were treated with TNF (100 ng/mL) + Smac-mimetic (500 nM) + caspase inhibitor (5  
351  $\mu$ M) (TSI) for the indicated timepoints before being subjected to anti-FLAG immunoprecipitation.

352  
353 **b**, GST-UBA pulldown of TNF-induced complex 2 from WT BMDM lysates. Cells were treated  
354 with TNF (100 ng/mL) + Smac-mimetic (500 nM) + caspase inhibitor (5  $\mu$ M) (TSI) for 1.5 hours  $\pm$   
355 IWR-1 (5  $\mu$ M). Western blot analysis of complex 2 and lysates using the indicated antibodies is  
356 shown.

357  
358 **c**, GST-UBA pulldown of TNF-induced complex 2 from WT BMDMs lysates. Cells were pre-  
359 treated with  $\pm$  proteasome inhibitor MG132 (10  $\mu$ M) for 2 hours, followed by TNF (10 ng/mL) +  
360 Smac-mimetic (50 nM) + caspase inhibitor (5  $\mu$ M) (TSI)  $\pm$  MG132 (10  $\mu$ M) for another 2 hours.  
361 Western blot analysis of complex 2 and lysates using the indicated antibodies is shown.

362

363 **d**, TNF-induced complex 2 immunoprecipitation using anti-RIPK1 antibody. WT MEFs expressing  
364 Dox-inducible shLuciferase or shRNF146 were pre-treated with  $\pm$  Dox (1 $\mu$ g/mL) for 48 hours.  
365 Cells were then treated with TNF (100 ng/mL) + Smac-mimetic (500 nM) + caspase inhibitor (5  
366  $\mu$ M) (TSI)  $\pm$  Dox (1 $\mu$ g/mL) for another 2 hours. Western blot analysis of complex 2 and lysates  
367 using the indicated antibodies is shown.

368  
369 **e**, Cell death monitored by time-lapse imaging of PI staining over 17 hours. WT MDFs expressing  
370 Dox-inducible shLuciferase or shRNF146 were pre-treated with  $\pm$  Dox (1 $\mu$ g/mL) for 48 hours,  
371 followed by TNF (100 ng/mL) + Smac-mimetic (50 nM) (TS)  $\pm$  Dox (1 $\mu$ g/mL) for another 17  
372 hours. n=1 biological repeat.

373  
374 Filled arrowheads alone indicate potential tankyrase species. Blots are representative of two to three  
375 independent experiments.

376

### 377 **Fig. 5 | Viral macrodomains sensitise cells to TNF-induced death**

378

379 Parental WT MDFs and MDFs expressing Dox-inducible GFP control or CFP-SARS-CoV-2  
380 macrodomain or CFP-VEEV macrodomain were pre-treated with  $\pm$  Dox (10ng/mL) for 3 hours.  
381 Cells were then treated with TNF (50 ng/mL) + Smac-mimetic (10 nM) (TS) in the absence of Dox  
382 for another 20 hours, and amount of cell death was assessed by PI staining and flow cytometry.  
383 Graphs show mean  $\pm$  SD throughout, n = 2 independent biological repeats.

384

385

386 **EXTENDED DATA FIGURE LEGENDS**

387

388 **Extended Data Fig. 1 | Tankyrase-1 is a novel interactor of native TNFR1 complex 2**

389

390 **a**, Western blot analysis of cell lysates from *Casp8<sup>-/-</sup>.Mik1<sup>-/-</sup>* MDFs expressing doxycycline (Dox)-  
391 inducible N- (red) or C- (blue) 3x FLAG tagged murine caspase-8 or tagless caspase-8. Wild-type  
392 (WT) or *Mik1<sup>-/-</sup>* MDFs expressing an empty vector (EV) were used as controls. Cells were treated  
393 with 20 ng/mL Dox for 3 hours and then Dox was withdrawn. Samples were harvested 0 hour or 20  
394 hours after Dox withdrawal for Western blot analysis.

395

396 **b**, Level of cell death assessed by propidium iodide (PI) positive cells. Cells were pre-treated with  
397 20 ng/mL Dox for 3 hours followed by stimulation with TNF (100 ng/mL) + Smac-mimetic  
398 compound A (500 nM) (TS) ± caspase inhibitor IDN-6556 (5 μM) for 20 hours in the absence of  
399 Dox. Graphs show mean ± SD, n=3 independent experiments. Comparisons were performed with a  
400 Student's t test whose values are denoted in the figures as \*p ≤ 0.05 and \*\*p ≤ 0.01.

401

402 **c**, Left, schematic depicting the anti-FLAG immunoprecipitation. Right, TNF-induced complex 2  
403 immunoprecipitation using anti-FLAG M2 affinity beads. Western blot analysis of complex 2 from  
404 *Casp8<sup>-/-</sup>.Mik1<sup>-/-</sup>* MDFs expressing Dox-inducible N- or C- 3x FLAG tagged murine caspase-8 or  
405 tagless caspase-8 using the indicated antibodies. Cells were treated with 20 ng/mL Dox for 3 hours  
406 followed by stimulation with TNF (100 ng/mL) + Smac-mimetic (500 nM) + caspase inhibitor (5  
407 μM) (TSI) for 1.5 hours in the absence of Dox before subjected to anti-FLAG immunoprecipitation.  
408 Caspase inhibitor was used to stabilize complex 2. The Western blot is representative of five  
409 independent experiments.

410

411 **d**, Schematic comparison of the domain architecture of the murine TNKS1, TNKS1 isoform2 and  
412 TNKS2. Domains are: HPS: histidine, proline and serine-rich region; ARD: ankyrin repeat  
413 domains; SAM: sterile α-motif; ART: poly(ADP-ribose) polymerases catalytic domain. ARDs  
414 provide binding sites for interaction between tankyrases and other proteins. The SAM domain  
415 mediates protein-protein interactions, form homo- and hetero-oligomers and also binds to DNA,  
416 RNA and lipids. SAM domain is also critical for optimal catalytic activity. The ART domain is  
417 responsible for the ADP-ribosyltransferase activity.

418

419 **e-f**, Schematic representation of the generation of *Casp8<sup>N3FLAG</sup>* (**e**) or *Casp8<sup>C3FLAG</sup>* (**f**) mice using  
420 CRIPSR/Cas9 technology. For N-3x FLAG tagged caspase-8 knock-in mice, an Asn Spacer was  
421 introduced into the oligo donor to ensure successful gene translation. For C-3x FLAG tagged  
422 caspase-8 knock-in mice, the PAM site was in exon 8 and an oligo donor composed of protein  
423 coding region of exon 9 with a 3x FLAG tag followed by two stop codons were designed because

424 there was no usable PAM site at the last exon (exon 9) of *Casp8* gene and a *Casp8* pseudogene  
425 known as Gm20257 showed ~133 bp of sequence identity to *Casp8* exon 9 and was nearby on the  
426 same chromosome (chromosome 1).

427  
428 **g-h**, TNF-induced complex 2 immunoprecipitation using anti-FLAG M2 affinity beads. Western  
429 blot analysis of complex 2 and lysates from *Casp8*<sup>+/+</sup>, *Casp8*<sup>+N3FLAG</sup> and *Casp8*<sup>+C3FLAG</sup> MDFs (**g**)  
430 or *Casp8*<sup>+C3FLAG</sup> BMDMs (**h**) using the indicated antibodies is shown. Cells were treated with TNF  
431 (100 ng/mL) + Smac-mimetic (500 nM) with or without caspase inhibitor (5 μM) for 1.5 hours  
432 before being subjected to anti-FLAG immunoprecipitation. Caspase inhibitor was used to stabilize  
433 complex 2.

434  
435 **i-j**, TNF-induced complex 2 immunoprecipitation. WT MEFs (**i**) or MDFs (**j**) were treated with TSI  
436 (as in **g-h**) to induce complex 2 assembly. The lysates were immunoprecipitated with anti-RIPK1 or  
437 anti-cleaved caspase-8 or anti-FADD or anti-tankyrase. Western blot analysis using the indicated  
438 antibodies is shown.

439  
440 **k-l**, TNF-induced complex 2 immunoprecipitation using anti-RIPK1. Western blot analysis of  
441 complex 2 and lysates from HT1080 (**k**) and HT29 (**l**) cells using the indicated antibodies is shown.  
442 Cells were treated with TSI (as in **g-h**) for indicated time points.

443 **m**, TNF-induced complex 2 immunoprecipitation using anti-FLAG M2 affinity beads. Western blot  
444 analysis of complex 2 and lysates from *Casp8*<sup>+C3FLAG</sup> MEFs using the indicated antibodies is  
445 shown. Cells were treated with TNF (100 ng/mL) + Smac-mimetic (500 nM) + caspase inhibitor (5  
446 μM) (TSI) for 2.5 hours or TNF (100 ng/mL) + cycloheximide (CHX) (1 μg/mL) + caspase  
447 inhibitor (5 μM) (TNF+CHX+IDN) for the indicated time points, followed by immunoprecipitation  
448 with anti-FLAG M2 affinity beads.

449  
450 **n**, TNF-induced complex 1 immunoprecipitation. WT MEFs were treated with Fc-TNF (1 μg/mL)  
451 for the indicated time points, followed by immunoprecipitation with protein A Sepharose and  
452 Western blot analysis.

453  
454 Filled arrowheads alone indicate potential tankyrase species. \*indicate IgG chains. Blots are  
455 representative of two to three independent experiments.

456

## 457 **Extended Data Fig. 2 | Complex 2 is PARylated**

458

459 **a**, GST-WWE pulldown of TNF-induced complex 2 from WT MDF lysates. Cells were treated with  
460 TNF (100 ng/mL) + Smac-mimetic (500 nM) + caspase inhibitor (5 μM) (TSI) for 1.5 hours ±



461 tankyrase inhibitor IWR-1 (10  $\mu$ M). Western blot analysis of complex 2 and lysates using the  
462 indicated antibodies is shown.

463

464 **b**, GST-WWE pulldown of TNF-induced complex 2. *Tnks2*<sup>-/-</sup> MDFs expressing Dox-inducible  
465 Scrambled shRNA or TNKS1 shRNA were pre-treated with  $\pm$  Dox (1 $\mu$ g/mL) for 48 hours before  
466 being stimulated with TNF (100 ng/mL) + Smac-mimetic (500 nM) + caspase inhibitor (5  $\mu$ M)  
467 (TSI)  $\pm$  Dox (1 $\mu$ g/mL) for 1.5 hours. Cell lysates were subjected to GST-WWE pulldown. Western  
468 blot analysis of complex 2 and lysates using the indicated antibodies is shown.

469

470 **c**, GST-WWE pulldown of TNF-induced complex 2. WT MEFs expressing Dox-inducible murine  
471 TNKS1 (isoform 2) or/and TNKS2 or empty vector were pre-treated with 20 ng/mL Dox overnight  
472 before being stimulated with TSI (as in **b**) for 1.5 hours. Cell lysates were subjected to GST-WWE  
473 pulldown. Western blot analysis of complex 2 and lysates using the indicated antibodies is shown.

474

475 **d**, Enrichment of PARylated complex 2 using GST-Af1521 in a sequential pulldown analysis.  
476 *Casp8*<sup>C3FLAG/C3FLAG</sup> BMDMs were treated with TSI (as in **b**) and complex 2 was  
477 immunoprecipitated using anti-FLAG M2 affinity beads. Immunoprecipitants were eluted using 3x  
478 FLAG peptides followed by GST-Af1521 pulldown. Western blot analysis of lysates and sequential  
479 pulldown using the indicated antibodies is shown.

480

481 **e**, GST-HUWE1, -TRIP12 and -RNF146 WWE pulldown of TNF-induced complex 2 from WT  
482 BMDMs. Cells were treated with TSI (as in **b**) and lysates were subjected to GST-WWE pulldown  
483 assays. Western blot analysis of complex 2 and lysates using the indicated antibodies is shown.

484

485 Ponceau S staining of the purified proteins and their quantities used in the pulldown assay is shown.  
486 Filled arrowheads alone indicate potential tankyrase species. Empty arrowheads alone denote  
487 unmodified RIPK1 that is purified non-specifically by Sepharose GST-WWE. Blots are  
488 representative of two to three independent experiments.

489

490

### 490 **Extended Data Fig. 3 | Tankyrases limit TNF-induced cell death**

491

492 **a**, Cell death of WT MDFs, monitored by time-lapse imaging of PI staining (dead cells) over 24  
493 hours. WT MDFs were treated with DMSO, TNF+cycloheximide (TNF+CHX) or TNF+Smac-  
494 mimetic (TS) (rows)  $\pm$  tankyrase inhibitor IWR-1 (columns) for 24 hours. TNF: 50 ng/mL. Smac-  
495 mimetic: 50nM. CHX: 0.25 $\mu$ g/mL, 0.5 $\mu$ g/mL, 1 $\mu$ g/mL. IWR-1: 250nM, 500nM, 1  $\mu$ M, 2  $\mu$ M. Cell  
496 death was quantified by PI uptake and time-lapse imaging every 1 hour using IncuCyte. Dashed  
497 lines denote the PI count without IWR treatment for reference. The results from two biologically  
498 independent MDF lines are shown.

499

500 **b**, Left, Western blot analysis of TNKS1 knockdown efficiency in *Tnks2<sup>-/-</sup>* MDFs expressing Dox-  
501 inducible shLuciferase, shScrambled or two independent TNKS1 shRNA. Cells were pre-treated  
502 with  $\pm$  Dox (1 $\mu$ g/mL) for 48 hours and then subjected to Western blot analysis. Filled arrowhead  
503 alone indicates potential tankyrase species. Right, *Tnks2<sup>-/-</sup>* MDFs expressing Dox-inducible  
504 shLuciferase, shScrambled or two independent TNKS1 shRNAs were pre-treated with  $\pm$  Dox  
505 (1 $\mu$ g/mL) for 48 hours followed by TNF (10 ng/mL) + Smac-mimetic (25 nM) (TS)  $\pm$  Dox  
506 (1 $\mu$ g/mL) for 16 hours. Cell death was quantified by PI uptake and time-lapse imaging every 1 hour  
507 using IncuCyte. Dashed lines denote the PI count in cells where the shRNA is not induced for  
508 reference. n=1 biological repeat.

509 **c**, Amount of cell death assessed by PI positive cells by flow cytometry. WT BMDMs were treated  
510 with TNF (10 ng/mL) + Smac-mimetic (500 nM) (TS) or TNF (10 ng/mL) + Smac-mimetic (10  
511 nM) + caspase inhibitor (5  $\mu$ M) (TSI)  $\pm$  tankyrase inhibitor IWR-1 or  $\pm$  Az6102 or  $\pm$  PARP1/2  
512 inhibitor olaparib for 16 hours. IWR-1: 250nM, 500nM, 1  $\mu$ M, 2  $\mu$ M, 5  $\mu$ M. Az6102: 125nM,  
513 250nM, 500nM, 1  $\mu$ M, 2  $\mu$ M. Olaparib: 62.5nM, 125nM, 250nM, 500nM, 1  $\mu$ M. Graphs show  
514 mean  $\pm$  SEM, n = 4-5 independent biological repeats. Comparisons were performed with a  
515 Student's t test whose values are denoted in the figures as \*p  $\leq$  0.05, \*\*p  $\leq$  0.01, \*\*\*p  $\leq$  0.001,  
516 \*\*\*\*p  $\leq$  0.0001 and n.s.= no significance.

517 **d**, Amount of cell death assessed by percentage of cell debris by flow cytometry. MLL-  
518 AF9/NRas<sup>G12D</sup> leukemic cells were treated with Smac-mimetic birinapant (500 nM)  $\pm$  tankyrase  
519 inhibitor IWR-1 (250nM, 500nM, 1  $\mu$ M, 2  $\mu$ M, 5  $\mu$ M) for 15 hours or Smac-mimetic birinapant (20  
520 nM) + caspase inhibitor IDN-6556 (5  $\mu$ M)  $\pm$  IWR-1 (250nM, 500nM, 1  $\mu$ M, 2  $\mu$ M, 5  $\mu$ M) for 7  
521 hours. Graphs show mean  $\pm$  SEM, n=3 biologically independent repeats. Comparisons were  
522 performed with a Student's t test whose values are denoted in the figures as \*p  $\leq$  0.05, \*\*p  $\leq$  0.01  
523 and \*\*\*p  $\leq$  0.001.

524 **e**, TNF-induced complex 2 immunoprecipitation using anti-FLAG M2 affinity beads. Western blot  
525 analysis of complex 2 and lysates from *Casp8<sup>C3FLAG/C3FLAG</sup>* MEFs using the indicated antibodies is  
526 shown. Cells were treated with TNF (100 ng/mL) + Smac-mimetic (50 nM) + caspase inhibitor (5  
527  $\mu$ M) (TSI)  $\pm$  tankyrase inhibitor IWR-1 (5  $\mu$ M) for 2 hours before being subjected to anti-FLAG  
528 immunoprecipitation. Filled arrowheads alone indicate potential tankyrase species. Blots are  
529 representative of two to three independent experiments.

530 **f**, Cell death monitored by time-lapse imaging of PI staining over 16 hours using IncuCyte.  
531 *Ripkl<sup>D325A/+</sup>* heterozygote MDFs were treated with TNF (50 ng/mL) + Smac-mimetic (10 nM or  
532 100nM) (TS)  $\pm$  tankyrase inhibitor IWR-1 (250nM, 500nM, 1  $\mu$ M, 2  $\mu$ M) for 16 hours. Dashed lines

537 denote the PI count without IWR-1 treatment for reference. The results from two biologically  
538 independent MDF lines are shown.

539

540 **Extended Data Fig. 4 | The tankyrase-RNF146 axis regulates the stability of complex 2 and**

541 **TNF-induced death**

542

543 Level of cell death assessed by PI positive cells. WT MEFs expressing Dox-inducible shLuciferase

544 or shRNF146 were pre-treated with  $\pm$  Dox (1  $\mu$ g/mL) for 48 hours. Cells were then subjected to

545 Western blot analysis or treated with TNF (100 ng/mL) + Smac-mimetic (25 nM) (TS)  $\pm$  Dox

546 (1 $\mu$ g/mL) for another 12 hours.

547

548 Blots are representative of two independent experiments.

549

550 Graphs show mean  $\pm$  SD throughout, n = 2 independent biological repeats.

551

552



587 CGGAAGAAGCTCTTCTTCCCTCCCGACTACAAGGACCACGACGGTGACTACAAGGACC  
588 ACGACATCGACTACAAAGACGATGACGACAAGGaatgaAGgtaagttggcctctgggccctctcagggtt  
589 atgcttcctactcatttctgtggtta) were injected into the cytoplasm of fertilized one-cell stage embryos  
590 generated from WT C57BL/6J breeders. To generate *Tnks2*<sup>-/-</sup> mice, 20 ng/μL of Cas9 mRNA, 10  
591 ng/μL of sgRNA (CTACACTACACCCGTATGGC and GGTTCCCTCATTCAGACGC) were  
592 injected into the cytoplasm of fertilized one-cell stage embryos generated from WT C57BL/6J  
593 breeders. 24 hours later, two-cell stage embryos were transferred into the uteri of pseudo-pregnant  
594 female mice. Viable offspring were genotyped by next-generation sequencing. Targeted animals  
595 were backcrossed twice to WT C57BL/6J to eliminate off-target mutations.

596

### 597 **Cells**

598

599 BMDMs were isolated from the tibia and femur of mice. MEFs were isolated from E14 embryos  
600 and MDFs were isolated from mouse tails. After SV40 transformation, MEFs and MDFs were  
601 tested for mycoplasma. 293T cells (ATCC) were used to produce SV40 viruses. HT29 were  
602 purchased from ATCC. HT1080 were gifts from Prof. John Mariadason. *Casp8*<sup>-/-</sup>.*Mkl1*<sup>-/-</sup> MDFs and  
603 *Mkl1*<sup>-/-</sup> MDFs were generated by Dr Maria Tanzer (WEHI, Australia). *Ripk1*<sup>D325A</sup> MDFs were  
604 generated by Dr Najoua Lalaoui (WEHI, Australia). MLL-AF9/NRas<sup>G12D</sup> leukemic cells were  
605 generated by Dr Gabriela Brumatti (WEHI, Australia).

606

### 607 **Reagents**

608

609 The Smac-mimetic compound A (Comp A), birinapant, the caspase inhibitor IDN-6556 (Idun  
610 Pharmaceuticals) and the RIPK1 inhibitor necrostatin-1 were synthesized by TetraLogic  
611 Pharmaceuticals. Recombinant Fc-TNF was produced in house. Lyophilised human TNF was a  
612 kind gift from Prof. Dr. Daniela N. Männel. MG132 (M7449), doxycycline (D9891), cycloheximide  
613 (C4859) and the tankyrase inhibitor IWR-1 (I0161) and the deubiquitinating enzyme inhibitor N-  
614 Ethylmaleimide (NEM) (E3876) were from Sigma. The tankyrase inhibitor Az6102 (S7767) and  
615 PARP1/2 inhibitor olaparib (S1060) were from Selleckchem. PARG was generated in house by  
616 M.O.H (University of Zurich). The PARG inhibitor ADP-HPD was from Enzo (ALX-480-094-  
617 C060). 3x FLAG peptide was from Apex Bio (A6001).

618

619

620

621 **Plasmids**

622

623 Constructs were designed by J.S. and synthesized by Genscript (Nanjing, CN) except for N- , C-3x  
624 FLAG tagged and tagless murine caspase-8 constructs (in house). In brief, inserts were generated  
625 by polymerase chain reaction (PCR) and fragments were sub-cloned into the pFTRE3G vector  
626 backbone. Fragments and vectors were ligated using *Bam*HI *Nhe* I sites. Restriction enzymes, T4  
627 DNA ligase and corresponding buffers were used as per manufacturer's instructions<sup>93</sup>. Ligation  
628 products were transformed into XL1-Blue competent cells (Agilent Technologies) and constructs  
629 were purified by miniprep kit (QIAGEN). Construct sequences were verified by Sanger sequencing  
630 performed by the Australian Genome Research Facility (AGRF).

631

632 **Inducible shRNA generation**

633

634 The Dox-inducible pF H1tUTG-GFP shRNA vector was kindly provided by A/Prof. Marco Herold  
635 (WEHI, Australia). The sequences of shRNAs are listed as following:

636

637 shLuciferase sense: 5'-tcccTGCGTTGCTAGTACCAACttcaagagaGTTGGTACTAGCAACGCA  
638 tttttc-3'

639 shLuciferase antisense: 5'-tcgagaaaaTGCGTTGCTAGTACCAACtctcttgaaGTTGGTACTAGCA  
640 ACGCA-3'

641 shScrambled sense: 5'-tcccTTCTCCGAACGTGTCACGTttcaagaga ACGTGACACGTTCCGAG  
642 AAtttttc-3'

643 shScrambled antisense: 5'-tcgagaaaaTTCTCCGAACGTGTCACGTtctcttgaa ACGTGACACGTT  
644 CGGAGAA-3'

645 shRNF146 sense: 5'-tcccATTTCTGCCACGTAACATTAttcaagagaTAATGTTACGTGGGCA  
646 GAAATttttc-3'

647 shRNF146 antisense: 5'-tcgagaaaaATTTCTGCCACGTAACATTAtctcttgaaTAATGTTACGT  
648 GGGCAGAAAT-3'

649 shTNKS1-1 sense: 5'-tcccCGTCTCTTAGAGGCATCGAAAttcaagagaTTTCGATGCCTCTAAG  
650 AGACGttttc-3'

651 shTNKS1-1 antisense: 5'-tcgagaaaaCGTCTCTTAGAGGCATCGAAAtctcttgaaTTTCGATGCC  
652 TCTAAGAGACG-3'

653 shTNKS1-2 sense: 5'-tcccGCTCCAGAAGATAAAGAATATtcaagagaATATTCTTTATCTTCT  
654 GGAGCttttc-3'



655 shTNKS1-2 antisense: 5'-tcgagaaaaGCTCCAGAAGATAAAGAATATtctcttgaaATATTCTTT  
656 ATCTTCTGGAGC-3'

657

658 shRNAs and pF H1tUTG-GFP vectors were ligated following *Xho* I /*Bsm* BI restriction digestion.  
659 shRNA cell lines were generated by infecting indicated cells with lentivirus containing Dox-  
660 inducible control shRNAs or shRNA targeting murine TNKS1 or RNF146 followed by  
661 fluorescence-activated cell sorting (FACS) for GFP fluorescent signal (excitation/emission=  
662 488/509 nm).

663

#### 664 **Immunoprecipitation**

665

666 For complex 1 purification, MEFs were seeded in 15 cm dishes and treated as indicated with Fc-  
667 TNF (1 µg/mL). Cells were lysed in DISC lysis buffer (150 mM sodium chloride, 2 mM EDTA, 1%  
668 Triton X-100, 10% glycerol, 20 mM Tris, pH 7.5). Protein lysates were immunoprecipitated with  
669 protein A Sepharose (40 µL/sample, WEHI antibody facility, Australia) for 4 hours at 4°C. Beads  
670 were washed 4 times with DISC and samples were eluted by boiling in 1x SDS loading dye. For  
671 complex 2 purification, cells were seeded in 15 cm dishes and treated as indicated. Cells were lysed  
672 in DISC. Protein G or protein A Sepharose (20 µL/sample, WEHI antibody facility, Australia) pre-  
673 blocked with DISC lysis buffer containing 2% BSA were bound with indicated antibody (1.5 µg  
674 antibody/ sample). Anti-cleaved caspase-8 (4790) and anti-RIPK1 (3493) were from cell signalling  
675 technology (CST). Anti-FADD (clone 7A2) was produced in house. Anti-tankyrase antibody (sc-  
676 365897) was from Santa Cruz Biotechnology. Anti-PAR (4335-MC-100) was from Trevigen.  
677 Protein lysates were precipitated at 4 °C overnight. Beads were washed 4 times with DISC and  
678 samples were eluted by boiling in 1x SDS loading buffer. For anti-FLAG immunoprecipitation,  
679 ANTI-FLAG® M2 Affinity Gel (15 µL/sample, Sigma) were blocked with DISC lysis buffer  
680 containing 2% BSA for 1 hour at 4°C and incubated with protein lysates at 4 °C overnight. After  
681 washing 4 times with DISC, samples were eluted with FLAG peptides (1mg/mL) and denatured by  
682 boiling in 5 x SDS loading buffer at 100°C for 15min.

683

#### 684 **GST pulldown assay**

685

686 For enrichment of PARylated proteins, plasmids pGEX 6P3 hs GST RNF146 WWE, pGEX 6P3 hs  
687 GST RNF146 WWE R163A, pGEX 6P3 hs HUWE1 WWE, pGEX 6P3 mm TRIP12 WWE, pGEX  
688 6P3 AF1521<sup>49,50,56</sup> were designed by J.S. and synthesized by Genscript (Nanjing, CN). Plasmids

689 were transformed into BL21 *E. coli* (DE3) (Thermo Fisher) and grown at 37°C to an optical density  
690 (600 nm) of ~0.6-0.8 in Super Broth before protein expression was induced with 1 mM IPTG  
691 (Sigma) overnight at 18°C. Recombinant protein was purified by Glutathione Xpure Agarose Resin  
692 (UBPBio) and size exclusion chromatography (SEC). BMDMs, MEFs or MDFs were treated as  
693 indicated and cells were lysed in DISC lysis buffer supplemented with 5 µM ADP-HPD. Equal  
694 protein amounts were incubated with Glutathione Sepharose<sup>®</sup> 4B (GE Healthcare) charged with  
695 GST fusion proteins overnight at 4°C. After washing 4 times with PBST buffer (PBS + 0.2%  
696 Tween-20 (Sigma)), samples were eluted by boiling at 100°C in 1x SDS loading buffer for 15min.  
697 For enrichment of ubiquitylated proteins, MEFs or MDFs were treated as indicated and cells were  
698 lysed in DISC lysis buffer supplemented with 10 mM NEM and incubated with Glutathione  
699 Sepharose<sup>®</sup> 4B pre-coupled with GST-UBA1 fusion protein (produced by Aleksandra Bankovacki,  
700 WEHI, Australia) overnight at 4°C. After washing 4 times with PBST buffer, samples were eluted  
701 by boiling in 1x SDS loading buffer at 100°C for 15min.

702

### 703 **PARG treatment**

704

705 Recombinant PARG generated in house by M.O.H. Immunoprecipitated TNFR1 complex 2 was  
706 eluted with FLAG peptides and the immunoprecipitants were diluted with 2x PARG reaction buffer  
707 (100 mM KH<sub>2</sub>PO<sub>4</sub>, 100 mM KCl, 0.2 mg/mL BSA, 0.2% Triton X-100). Recombinant PARG (7.2  
708 µg/sample) was added and the reaction mixture was incubated at 37°C for 3 hours, followed by  
709 GST-WWE pulldown overnight at 4°C.

710

### 711 **Western blotting**

712

713 Cells lysates were separated on 4-20% gradient SDS-polyacrylamide gels (Biorad), transferred to  
714 polyvinylidene fluoride (Millipore) membranes and blotted with indicated antibodies purchased  
715 from CST except for caspase-8 (M058-3, MBL Life Science), RIPK3 (33/16-8G7-1-1, WEHI  
716 antibody facility, Australia), phospho-RIPK3 (a gift from Genentech), phospho-MLKL (ab196436,  
717 Abcam), FADD (ADI-AAM-212-E, Enzo), tankyrases (sc-365897, Santa Cruz Biotechnology),  
718 PAR (MABC547, Sigma), RNF146 (73-233, NeuroMab), cIAP1 (clone 1E1-1-12, in house), actin  
719 (A1978, Sigma) and HSP90 (ADI-SPA-835, Enzo).

720

721

722

723

## 724 **Flow cytometry**

725

726  $2 \times 10^4$  MEFs or MDFs were seeded in 96 well plates and  $2 \times 10^5$  BMDMs were seeded in 48 well  
727 plates. 24 hours later cells were treated as indicated for the indicated times. Cells were then  
728 trypsinized and collected into 1.2 mL FACS tubes. Propidium iodide (PI, 1 mg/mL) was added and  
729 cells were spun down at 300 g for 5 min at 4°C. PI signal was excited by Blue laser (488 nm) and  
730 the emission was received through B660LP filter.  $1 \times 10^4$  of MLL-AF9/NRas<sup>G12D</sup> cells were seeded  
731 in 96 well plates and treated as indicated for the indicated times. Cell death was analysed by flow  
732 cytometry using a FACSCalibur (BD Biosciences).

733

## 734 **Time-lapse imaging (IncuCyte)**

735

736 Percentage cell death was assayed every 45 min to 1 hour by time-lapse imaging using the IncuCyte  
737 live cell analysis imaging (Essenbioscience) for 16-24 hours with 5% CO<sub>2</sub> and 37°C climate  
738 control. Dead cells were identified by PI (0.25 µg/mL) staining. PI was added to the cells 2 hours  
739 before imaging and compounds were added 10 min before the start of imaging. Dead cells were  
740 counted using the in-built 'Basic' analysis software and PI positive cells were calculated based on  
741 the imaged area.

742

## 743 **Mass spectrometry**

744

745 After anti-FLAG immunoprecipitation, samples were eluted with FLAG peptide and then added to  
746 a filter-aided sample preparation (FASP) column (J.J.S., WEHI, Australia) and spun (14,000 g)  
747 until volume had passed through the column. Protein material was reduced with tris(2-carboxyethyl)  
748 phosphine (TCEP; 10 mM final) and digested overnight with 2 µg sequence-grade modified trypsin  
749 Gold (Promega, V5280) in 50 mM ammonium bicarbonate (NH<sub>4</sub>HCO<sub>3</sub>) at 37°C. Peptides were  
750 collected into microvial tubes and acidified with formic acid (FA) to a final concentration of 1%  
751 (v/v). Samples were frozen at -80°C and subsequently lyophilised.

752

753 Peptides were resuspended in 2% (v/v) acetonitrile (ACN) and 1% (v/v) FA and injected and  
754 separated by reversed phase liquid chromatography on a M-class UHPLC system (Waters, USA)  
755 using a 250 mm x 75 mm column (1.7mm C18, packed emitter tip, Ion Opticks, Australia) with a  
756 linear 90 min gradient at a flow rate of 400 nl/min from 98% (v/v) solvent A (0.1% (v/v) FA in

757 Milli-Q water) to 35% (v/v) solvent B (0.1% (v/v) FA, 99.9% (v/v) ACN). The nano-UHPLC was  
758 coupled on-line to a Q-Exactive Orbitrap mass spectrometer equipped with an EASY-spray  
759 ionization source (Thermo Fisher Scientific, Germany). The Q-Exactive was operated in a data-  
760 dependent mode, switching automatically between one full-scan and subsequent MS/MS scans of  
761 the ten most abundant peaks. The instrument was controlled using Exactive series version 2.8 build  
762 2806 and Xcalibur 4.0. Full-scans (m/z 350–1,850) were acquired with a resolution of 70,000 at  
763 200 m/z. The 10 most intense ions were sequentially isolated with a target value of 1e5 ions and an  
764 isolation width of 2 m/z and fragmented using higher-energy collisional dissociation with stepped  
765 normalised collision energy of 19.5, 26, 32. Maximum ion accumulation times were set to 80 ms for  
766 full MS scan and 200 ms for MS/MS.

767

768 All raw files were analyzed by MaxQuant v1.6.10.43 software using the integrated Andromeda  
769 search engine. Data was searched against the mouse Uniprot Reference Proteome with isoforms  
770 (downloaded March 2018) and a separate reverse decoy database using a strict trypsin specificity  
771 allowing up to 2 missed cleavages. The minimum required peptide length was set to 7 amino acids.  
772 Modifications: Carbamidomethylation of Cys was set as a fixed modification, while N-terminal  
773 acetylation of proteins and oxidation of Met were set as variable modifications. First search peptide  
774 tolerance was set at 20 ppm and main search set at 4.5 ppm (other settings left as default). Matching  
775 between runs and LFQ quantitation was turned on. Maximum peptide mass [Da] was set at 8000.  
776 All other settings in group or global parameters were left as default.

777

778 Further analysis was performed using a custom pipeline developed in R (3.6.1), which utilizes the  
779 LFQ intensity values in the MaxQuant output file proteinGroups.txt. Proteins not found in at least  
780 50% of the replicates in one group were removed. Missing values were imputed using a random  
781 normal distribution of values with the mean set at mean of the real distribution of values minus 1.8  
782 s.d., and a s.d. of 0.3 times the s.d. of the distribution of the measured intensities. The log<sub>2</sub> fold  
783 changes and probability of differential expression between groups was calculated using the Limma  
784 R package (3.4.2). Probability values were corrected for multiple testing using Benjamini-Hochberg  
785 method.

786

## 787 **Statistical analyses**

788

789 The number of independent experiments for each dataset is stipulated in the respective figure  
790 legend. Comparisons were performed with a Student's t test whose values are represented in the

791 figures as \* $p \leq 0.05$ , \*\* $p \leq 0.01$ , \*\*\* $p \leq 0.001$  and \*\*\*\* $p \leq 0.0001$  and n.s.= no significance using  
792 Prism v.8.2 (GraphPad).

793

## 794 **References**

795

796 1 Annibaldi, A. & Meier, P. Checkpoints in TNF-Induced Cell Death: Implications in  
797 Inflammation and Cancer. *Trends Mol Med* **24**, 49-65, doi:10.1016/j.molmed.2017.11.002  
798 (2018).

799 2 Silke, J. & Hartland, E. L. Masters, marionettes and modulators: intersection of pathogen  
800 virulence factors and mammalian death receptor signaling. *Curr Opin Immunol* **25**, 436-440,  
801 doi:10.1016/j.coi.2013.05.011 (2013).

802 3 Micheau, O. & Tschopp, J. Induction of TNF receptor I-mediated apoptosis via two  
803 sequential signaling complexes. *Cell* **114**, 181-190, doi:10.1016/s0092-8674(03)00521-x  
804 (2003).

805 4 Silke, J. The regulation of TNF signalling: what a tangled web we weave. *Curr Opin  
806 Immunol* **23**, 620-626, doi:10.1016/j.coi.2011.08.002 (2011).

807 5 Bertrand, M. J. *et al.* cIAP1 and cIAP2 facilitate cancer cell survival by functioning as E3  
808 ligases that promote RIP1 ubiquitination. *Mol Cell* **30**, 689-700,  
809 doi:10.1016/j.molcel.2008.05.014 (2008).

810 6 Haas, T. L. *et al.* Recruitment of the linear ubiquitin chain assembly complex stabilizes the  
811 TNF-R1 signaling complex and is required for TNF-mediated gene induction. *Mol Cell* **36**,  
812 831-844, doi:10.1016/j.molcel.2009.10.013 (2009).

813 7 Gerlach, B. *et al.* Linear ubiquitination prevents inflammation and regulates immune  
814 signalling. *Nature* **471**, 591-596, doi:10.1038/nature09816 (2011).

815 8 Ikeda, F. *et al.* SHARPIN forms a linear ubiquitin ligase complex regulating NF-kappaB  
816 activity and apoptosis. *Nature* **471**, 637-641, doi:10.1038/nature09814 (2011).

817 9 Tokunaga, F. *et al.* SHARPIN is a component of the NF-kappaB-activating linear ubiquitin  
818 chain assembly complex. *Nature* **471**, 633-636, doi:10.1038/nature09815 (2011).

819 10 Kanayama, A. *et al.* TAB2 and TAB3 activate the NF-kappaB pathway through binding to  
820 polyubiquitin chains. *Mol Cell* **15**, 535-548, doi:10.1016/j.molcel.2004.08.008 (2004).

821 11 Kondylis, V., Kumari, S., Vlantis, K. & Pasparakis, M. The interplay of IKK, NF-kappaB  
822 and RIPK1 signaling in the regulation of cell death, tissue homeostasis and inflammation.  
823 *Immunol Rev* **277**, 113-127, doi:10.1111/imr.12550 (2017).

824 12 Zhang, J., Clark, K., Lawrence, T., Peggie, M. W. & Cohen, P. An unexpected twist to the  
825 activation of IKKbeta: TAK1 primes IKKbeta for activation by autophosphorylation.  
826 *Biochem J* **461**, 531-537, doi:10.1042/BJ20140444 (2014).

827 13 Wang, C. *et al.* TAK1 is a ubiquitin-dependent kinase of MKK and IKK. *Nature* **412**, 346-  
828 351, doi:10.1038/35085597 (2001).

829 14 Micheau, O., Lens, S., Gaide, O., Alevizopoulos, K. & Tschopp, J. NF-kappaB signals  
830 induce the expression of c-FLIP. *Mol Cell Biol* **21**, 5299-5305,  
831 doi:10.1128/MCB.21.16.5299-5305.2001 (2001).

832 15 Lalaoui, N. & Vaux, D. L. Recent advances in understanding inhibitor of apoptosis proteins.  
833 *F1000Res* **7**, doi:10.12688/f1000research.16439.1 (2018).

834 16 Mifflin, L., Ofengeim, D. & Yuan, J. Receptor-interacting protein kinase 1 (RIPK1) as a  
835 therapeutic target. *Nat Rev Drug Discov* **19**, 553-571, doi:10.1038/s41573-020-0071-y  
836 (2020).

837 17 Zhang, Q., Lenardo, M. J. & Baltimore, D. 30 Years of NF-kappaB: A Blossoming of  
838 Relevance to Human Pathobiology. *Cell* **168**, 37-57, doi:10.1016/j.cell.2016.12.012 (2017).

- 839 18 Rahman, M. M. & McFadden, G. Modulation of tumor necrosis factor by microbial  
840 pathogens. *PLoS Pathog* **2**, e4, doi:10.1371/journal.ppat.0020004 (2006).
- 841 19 Dondelinger, Y. *et al.* RIPK3 contributes to TNFR1-mediated RIPK1 kinase-dependent  
842 apoptosis in conditions of cIAP1/2 depletion or TAK1 kinase inhibition. *Cell Death Differ*  
843 **20**, 1381-1392, doi:10.1038/cdd.2013.94 (2013).
- 844 20 Dondelinger, Y. *et al.* NF-kappaB-Independent Role of IKKalpha/IKKbeta in Preventing  
845 RIPK1 Kinase-Dependent Apoptotic and Necroptotic Cell Death during TNF Signaling.  
846 *Mol Cell* **60**, 63-76, doi:10.1016/j.molcel.2015.07.032 (2015).
- 847 21 Lalaoui, N. *et al.* Targeting p38 or MK2 Enhances the Anti-Leukemic Activity of Smac-  
848 Mimetics. *Cancer Cell* **29**, 145-158, doi:10.1016/j.ccell.2016.01.006 (2016).
- 849 22 Jaco, I. *et al.* MK2 Phosphorylates RIPK1 to Prevent TNF-Induced Cell Death. *Mol Cell* **66**,  
850 698-710 e695, doi:10.1016/j.molcel.2017.05.003 (2017).
- 851 23 Lafont, E. *et al.* TBK1 and IKKepsilon prevent TNF-induced cell death by RIPK1  
852 phosphorylation. *Nat Cell Biol* **20**, 1389-1399, doi:10.1038/s41556-018-0229-6 (2018).
- 853 24 Moquin, D. M., McQuade, T. & Chan, F. K. CYLD deubiquitinates RIP1 in the TNFalpha-  
854 induced necrosome to facilitate kinase activation and programmed necrosis. *PLoS One* **8**,  
855 e76841, doi:10.1371/journal.pone.0076841 (2013).
- 856 25 Onizawa, M. *et al.* The ubiquitin-modifying enzyme A20 restricts ubiquitination of the  
857 kinase RIPK3 and protects cells from necroptosis. *Nat Immunol* **16**, 618-627,  
858 doi:10.1038/ni.3172 (2015).
- 859 26 Xu, D. *et al.* TBK1 Suppresses RIPK1-Driven Apoptosis and Inflammation during  
860 Development and in Aging. *Cell* **174**, 1477-1491 e1419, doi:10.1016/j.cell.2018.07.041  
861 (2018).
- 862 27 Geng, J. *et al.* Regulation of RIPK1 activation by TAK1-mediated phosphorylation dictates  
863 apoptosis and necroptosis. *Nat Commun* **8**, 359, doi:10.1038/s41467-017-00406-w (2017).
- 864 28 Dondelinger, Y. *et al.* Serine 25 phosphorylation inhibits RIPK1 kinase-dependent cell  
865 death in models of infection and inflammation. *Nat Commun* **10**, 1729, doi:10.1038/s41467-  
866 019-09690-0 (2019).
- 867 29 Dondelinger, Y. *et al.* MK2 phosphorylation of RIPK1 regulates TNF-mediated cell death.  
868 *Nat Cell Biol* **19**, 1237-1247, doi:10.1038/ncb3608 (2017).
- 869 30 Varfolomeev, E. *et al.* IAP antagonists induce autoubiquitination of c-IAPs, NF-kappaB  
870 activation, and TNFalpha-dependent apoptosis. *Cell* **131**, 669-681,  
871 doi:10.1016/j.cell.2007.10.030 (2007).
- 872 31 Vince, J. E. *et al.* IAP antagonists target cIAP1 to induce TNFalpha-dependent apoptosis.  
873 *Cell* **131**, 682-693, doi:10.1016/j.cell.2007.10.037 (2007).
- 874 32 Feltham, R. *et al.* Mind Bomb Regulates Cell Death during TNF Signaling by Suppressing  
875 RIPK1's Cytotoxic Potential. *Cell Rep* **23**, 470-484, doi:10.1016/j.celrep.2018.03.054  
876 (2018).
- 877 33 Silke, J., Rickard, J. A. & Gerlic, M. The diverse role of RIP kinases in necroptosis and  
878 inflammation. *Nature immunology* **16**, 689-697, doi:10.1038/ni.3206 (2015).
- 879 34 Pasparakis, M. & Vandenabeele, P. Necroptosis and its role in inflammation. *Nature* **517**,  
880 311-320, doi:10.1038/nature14191 (2015).
- 881 35 Webster, J. D. & Vucic, D. The Balance of TNF Mediated Pathways Regulates  
882 Inflammatory Cell Death Signaling in Healthy and Diseased Tissues. *Front Cell Dev Biol* **8**,  
883 365, doi:10.3389/fcell.2020.00365 (2020).
- 884 36 Liu, L. & Lalaoui, N. 25 years of research put RIPK1 in the clinic. *Semin Cell Dev Biol*,  
885 doi:10.1016/j.semcdb.2020.08.007 (2020).
- 886 37 Wallach, D., Kang, T. B. & Kovalenko, A. Concepts of tissue injury and cell death in  
887 inflammation: a historical perspective. *Nat Rev Immunol* **14**, 51-59, doi:10.1038/nri3561  
888 (2014).



- 889 38 Petersen, S. L. *et al.* Autocrine TNF $\alpha$  signaling renders human cancer cells susceptible  
890 to Smac-mimetic-induced apoptosis. *Cancer Cell* **12**, 445-456,  
891 doi:10.1016/j.ccr.2007.08.029 (2007).
- 892 39 Natori, S., Higuchi, H., Contreras, P. & Gores, G. J. The caspase inhibitor IDN-6556  
893 prevents caspase activation and apoptosis in sinusoidal endothelial cells during liver  
894 preservation injury. *Liver Transpl* **9**, 278-284, doi:10.1053/jlts.2003.50019 (2003).
- 895 40 Hoglen, N. C. *et al.* Characterization of IDN-6556 (3-[2-(2-tert-butyl-phenylaminoxy)-  
896 amino]-propionylamino]-4-oxo-5-(2,3,5,6-tetrafluoro-phenoxy)-pentanoic acid): a liver-  
897 targeted caspase inhibitor. *J Pharmacol Exp Ther* **309**, 634-640,  
898 doi:10.1124/jpet.103.062034 (2004).
- 899 41 Hottiger, M. O., Hassa, P. O., Luscher, B., Schuler, H. & Koch-Nolte, F. Toward a unified  
900 nomenclature for mammalian ADP-ribosyltransferases. *Trends Biochem Sci* **35**, 208-219,  
901 doi:10.1016/j.tibs.2009.12.003 (2010).
- 902 42 Hsiao, S. J. & Smith, S. Tankyrase function at telomeres, spindle poles, and beyond.  
903 *Biochimie* **90**, 83-92, doi:10.1016/j.biochi.2007.07.012 (2008).
- 904 43 Wang, L., Du, F. & Wang, X. TNF- $\alpha$  induces two distinct caspase-8 activation  
905 pathways. *Cell* **133**, 693-703, doi:10.1016/j.cell.2008.03.036 (2008).
- 906 44 Ting, A. T. & Bertrand, M. J. M. More to Life than NF- $\kappa$ B in TNFR1 Signaling. *Trends*  
907 *Immunol* **37**, 535-545, doi:10.1016/j.it.2016.06.002 (2016).
- 908 45 Varfolomeev, E. & Vucic, D. Intracellular regulation of TNF activity in health and disease.  
909 *Cytokine* **101**, 26-32, doi:10.1016/j.cyto.2016.08.035 (2018).
- 910 46 Riffell, J. L., Lord, C. J. & Ashworth, A. Tankyrase-targeted therapeutics: expanding  
911 opportunities in the PARP family. *Nat Rev Drug Discov* **11**, 923-936, doi:10.1038/nrd3868  
912 (2012).
- 913 47 Chen, B. *et al.* Small molecule-mediated disruption of Wnt-dependent signaling in tissue  
914 regeneration and cancer. *Nat Chem Biol* **5**, 100-107, doi:10.1038/nchembio.137 (2009).
- 915 48 Levaot, N. *et al.* Loss of Tankyrase-mediated destruction of 3BP2 is the underlying  
916 pathogenic mechanism of cherubism. *Cell* **147**, 1324-1339, doi:10.1016/j.cell.2011.10.045  
917 (2011).
- 918 49 Gibson, B. A., Conrad, L. B., Huang, D. & Kraus, W. L. Generation and Characterization of  
919 Recombinant Antibody-like ADP-Ribose Binding Proteins. *Biochemistry* **56**, 6305-6316,  
920 doi:10.1021/acs.biochem.7b00670 (2017).
- 921 50 Zhang, Y. *et al.* RNF146 is a poly(ADP-ribose)-directed E3 ligase that regulates axin  
922 degradation and Wnt signalling. *Nat Cell Biol* **13**, 623-629, doi:10.1038/ncb2222 (2011).
- 923 51 Thorsell, A. G. *et al.* Structural Basis for Potency and Promiscuity in Poly(ADP-ribose)  
924 Polymerase (PARP) and Tankyrase Inhibitors. *J Med Chem* **60**, 1262-1271,  
925 doi:10.1021/acs.jmedchem.6b00990 (2017).
- 926 52 Bhardwaj, A., Yang, Y., Ueberheide, B. & Smith, S. Whole proteome analysis of human  
927 tankyrase knockout cells reveals targets of tankyrase-mediated degradation. *Nat Commun* **8**,  
928 2214, doi:10.1038/s41467-017-02363-w (2017).
- 929 53 Hatakeyama, K., Nemoto, Y., Ueda, K. & Hayaishi, O. Purification and characterization of  
930 poly(ADP-ribose) glycohydrolase. Different modes of action on large and small poly(ADP-  
931 ribose). *J Biol Chem* **261**, 14902-14911 (1986).
- 932 54 Meyer-Ficca, M. L., Meyer, R. G., Coyle, D. L., Jacobson, E. L. & Jacobson, M. K. Human  
933 poly(ADP-ribose) glycohydrolase is expressed in alternative splice variants yielding  
934 isoforms that localize to different cell compartments. *Exp Cell Res* **297**, 521-532,  
935 doi:10.1016/j.yexcr.2004.03.050 (2004).
- 936 55 Aravind, L. The WWE domain: a common interaction module in protein ubiquitination and  
937 ADP ribosylation. *Trends Biochem Sci* **26**, 273-275 (2001).

- 938 56 Wang, Z. *et al.* Recognition of the iso-ADP-ribose moiety in poly(ADP-ribose) by WWE  
939 domains suggests a general mechanism for poly(ADP-ribosyl)ation-dependent  
940 ubiquitination. *Genes Dev* **26**, 235-240, doi:10.1101/gad.182618.111 (2012).
- 941 57 Silke, J. & Meier, P. Inhibitor of apoptosis (IAP) proteins-modulators of cell death and  
942 inflammation. *Cold Spring Harb Perspect Biol* **5**, doi:10.1101/cshperspect.a008730 (2013).
- 943 58 Fulda, S. Promises and Challenges of Smac Mimetics as Cancer Therapeutics. *Clin Cancer*  
944 *Res* **21**, 5030-5036, doi:10.1158/1078-0432.CCR-15-0365 (2015).
- 945 59 Vandenabeele, P., Galluzzi, L., Vanden Berghe, T. & Kroemer, G. Molecular mechanisms  
946 of necroptosis: an ordered cellular explosion. *Nat Rev Mol Cell Biol* **11**, 700-714,  
947 doi:10.1038/nrm2970 (2010).
- 948 60 Silke, J. & Vucic, D. IAP family of cell death and signaling regulators. *Methods Enzymol*  
949 **545**, 35-65, doi:10.1016/B978-0-12-801430-1.00002-0 (2014).
- 950 61 Murphy, J. M. *et al.* The pseudokinase MLKL mediates necroptosis via a molecular switch  
951 mechanism. *Immunity* **39**, 443-453, doi:10.1016/j.immuni.2013.06.018 (2013).
- 952 62 Sun, L. *et al.* Mixed lineage kinase domain-like protein mediates necrosis signaling  
953 downstream of RIP3 kinase. *Cell* **148**, 213-227, doi:10.1016/j.cell.2011.11.031 (2012).
- 954 63 Degtarev, A., Ofengeim, D. & Yuan, J. Targeting RIPK1 for the treatment of human  
955 diseases. *Proc Natl Acad Sci U S A* **116**, 9714-9722, doi:10.1073/pnas.1901179116 (2019).
- 956 64 Kondylis, V. & Pasparakis, M. RIP Kinases in Liver Cell Death, Inflammation and Cancer.  
957 *Trends Mol Med* **25**, 47-63, doi:10.1016/j.molmed.2018.10.007 (2019).
- 958 65 Newton, K. Multitasking Kinase RIPK1 Regulates Cell Death and Inflammation. *Cold*  
959 *Spring Harb Perspect Biol* **12**, doi:10.1101/cshperspect.a036368 (2020).
- 960 66 Laurien, L. *et al.* Autophosphorylation at serine 166 regulates RIP kinase 1-mediated cell  
961 death and inflammation. *Nat Commun* **11**, 1747, doi:10.1038/s41467-020-15466-8 (2020).
- 962 67 He, S. *et al.* Receptor interacting protein kinase-3 determines cellular necrotic response to  
963 TNF-alpha. *Cell* **137**, 1100-1111, doi:10.1016/j.cell.2009.05.021 (2009).
- 964 68 Cho, Y. S. *et al.* Phosphorylation-driven assembly of the RIP1-RIP3 complex regulates  
965 programmed necrosis and virus-induced inflammation. *Cell* **137**, 1112-1123,  
966 doi:10.1016/j.cell.2009.05.037 (2009).
- 967 69 Li, J. *et al.* The RIP1/RIP3 necrosome forms a functional amyloid signaling complex  
968 required for programmed necrosis. *Cell* **150**, 339-350, doi:10.1016/j.cell.2012.06.019  
969 (2012).
- 970 70 Najafov, A. *et al.* TAM Kinases Promote Necroptosis by Regulating Oligomerization of  
971 MLKL. *Mol Cell* **75**, 457-468 e454, doi:10.1016/j.molcel.2019.05.022 (2019).
- 972 71 Lalaoui, N. *et al.* Mutations that prevent caspase cleavage of RIPK1 cause autoinflammatory  
973 disease. *Nature* **577**, 103-108, doi:10.1038/s41586-019-1828-5 (2020).
- 974 72 Li, N. *et al.* Poly-ADP ribosylation of PTEN by tankyrases promotes PTEN degradation and  
975 tumor growth. *Genes Dev* **29**, 157-170, doi:10.1101/gad.251785.114 (2015).
- 976 73 Li, N. *et al.* Tankyrase disrupts metabolic homeostasis and promotes tumorigenesis by  
977 inhibiting LKB1-AMPK signalling. *Nat Commun* **10**, 4363, doi:10.1038/s41467-019-12377-  
978 1 (2019).
- 979 74 Wang, W. *et al.* Tankyrase Inhibitors Target YAP by Stabilizing Angiomotin Family  
980 Proteins. *Cell Rep* **13**, 524-532, doi:10.1016/j.celrep.2015.09.014 (2015).
- 981 75 Li, P. *et al.* Tankyrase Mediates K63-Linked Ubiquitination of JNK to Confer Stress  
982 Tolerance and Influence Lifespan in *Drosophila*. *Cell Rep* **25**, 437-448,  
983 doi:10.1016/j.celrep.2018.09.036 (2018).
- 984 76 DaRosa, P. A. *et al.* Allosteric activation of the RNF146 ubiquitin ligase by a poly(ADP-  
985 ribosyl)ation signal. *Nature* **517**, 223-226, doi:10.1038/nature13826 (2015).
- 986 77 Callow, M. G. *et al.* Ubiquitin ligase RNF146 regulates tankyrase and Axin to promote Wnt  
987 signaling. *PLoS One* **6**, e22595, doi:10.1371/journal.pone.0022595 (2011).

- 988 78 Kim, W., Kim, M. & Jho, E. H. Wnt/beta-catenin signalling: from plasma membrane to  
989 nucleus. *Biochem J* **450**, 9-21, doi:10.1042/BJ20121284 (2013).
- 990 79 Alhammad, Y. M. O. *et al.* The SARS-CoV-2 conserved macrodomain is a highly efficient  
991 ADP-ribosylhydrolase enzyme. *bioRxiv*, doi:10.1101/2020.05.11.089375 (2020).
- 992 80 Makrynitsa, G. I. *et al.* Conformational plasticity of the VEEV macro domain is important  
993 for binding of ADP-ribose. *J Struct Biol* **206**, 119-127, doi:10.1016/j.jsb.2019.02.008  
994 (2019).
- 995 81 Leung, A. K. L., McPherson, R. L. & Griffin, D. E. Macrodomain ADP-ribosylhydrolase  
996 and the pathogenesis of infectious diseases. *PLoS Pathog* **14**, e1006864,  
997 doi:10.1371/journal.ppat.1006864 (2018).
- 998 82 Rack, J. G., Perina, D. & Ahel, I. Macrodomains: Structure, Function, Evolution, and  
999 Catalytic Activities. *Annu Rev Biochem* **85**, 431-454, doi:10.1146/annurev-biochem-  
1000 060815-014935 (2016).
- 1001 83 Feijs, K. L., Forst, A. H., Verheugd, P. & Luscher, B. Macrodomain-containing proteins:  
1002 regulating new intracellular functions of mono(ADP-ribosylation). *Nat Rev Mol Cell Biol*  
1003 **14**, 443-451, doi:10.1038/nrm3601 (2013).
- 1004 84 Nowak, K. *et al.* Engineering Af1521 improves ADP-ribose binding and identification of  
1005 ADP-ribosylated proteins. *Nat Commun* **11**, 5199, doi:10.1038/s41467-020-18981-w  
1006 (2020).
- 1007 85 Han, W., Li, X. & Fu, X. The macro domain protein family: structure, functions, and their  
1008 potential therapeutic implications. *Mutat Res* **727**, 86-103, doi:10.1016/j.mrrev.2011.03.001  
1009 (2011).
- 1010 86 Ma, B. & Hottiger, M. O. Crosstalk between Wnt/beta-Catenin and NF-kappaB Signaling  
1011 Pathway during Inflammation. *Front Immunol* **7**, 378, doi:10.3389/fimmu.2016.00378  
1012 (2016).
- 1013 87 Ha, G. H. *et al.* Tankyrase-1 function at telomeres and during mitosis is regulated by Polo-  
1014 like kinase-1-mediated phosphorylation. *Cell Death Differ* **19**, 321-332,  
1015 doi:10.1038/cdd.2011.101 (2012).
- 1016 88 Li, S. *et al.* SARS-CoV-2 triggers inflammatory responses and cell death through caspase-8  
1017 activation. *Signal Transduct Target Ther* **5**, 235, doi:10.1038/s41392-020-00334-0 (2020).
- 1018 89 Karki, R. *et al.* COVID-19 cytokines and the hyperactive immune response: Synergism of  
1019 TNF-alpha and IFN-gamma in triggering inflammation, tissue damage, and death. *bioRxiv*,  
1020 doi:10.1101/2020.10.29.361048 (2020).
- 1021 90 Verheugd, P. *et al.* Regulation of NF-kappaB signalling by the mono-ADP-  
1022 ribosyltransferase ARTD10. *Nat Commun* **4**, 1683, doi:10.1038/ncomms2672 (2013).
- 1023 91 Fehr, A. R. *et al.* The impact of PARPs and ADP-ribosylation on inflammation and host-  
1024 pathogen interactions. *Genes Dev* **34**, 341-359, doi:10.1101/gad.334425.119 (2020).
- 1025 92 Palazzo, L., Mikolcevic, P., Mikoc, A. & Ahel, I. ADP-ribosylation signalling and human  
1026 disease. *Open Biol* **9**, 190041, doi:10.1098/rsob.190041 (2019).
- 1027 93 Horton, J. R. *et al.* Modification-dependent restriction endonuclease, MspJI, flips 5-  
1028 methylcytosine out of the DNA helix. *Nucleic Acids Res* **42**, 12092-12101,  
1029 doi:10.1093/nar/gku871 (2014).
- 1030

**Fig. 1****a**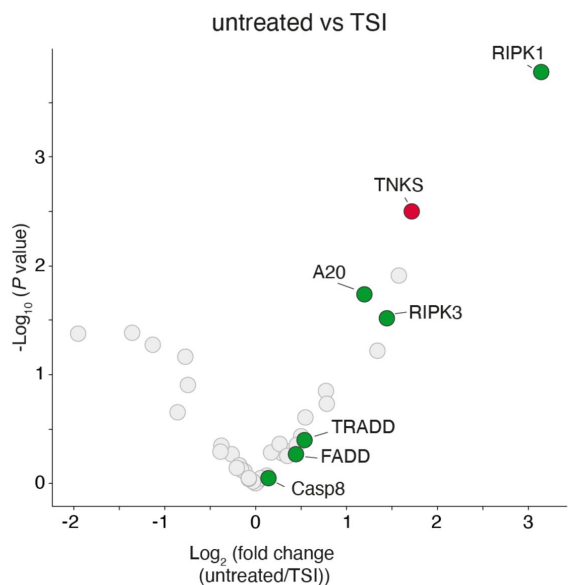**b**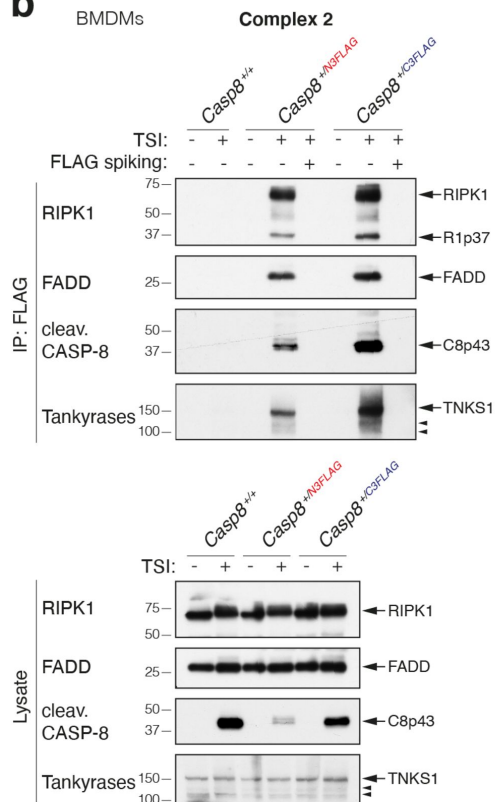**c** BMDMs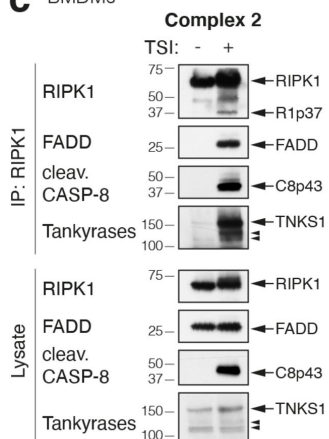**d** BMDMs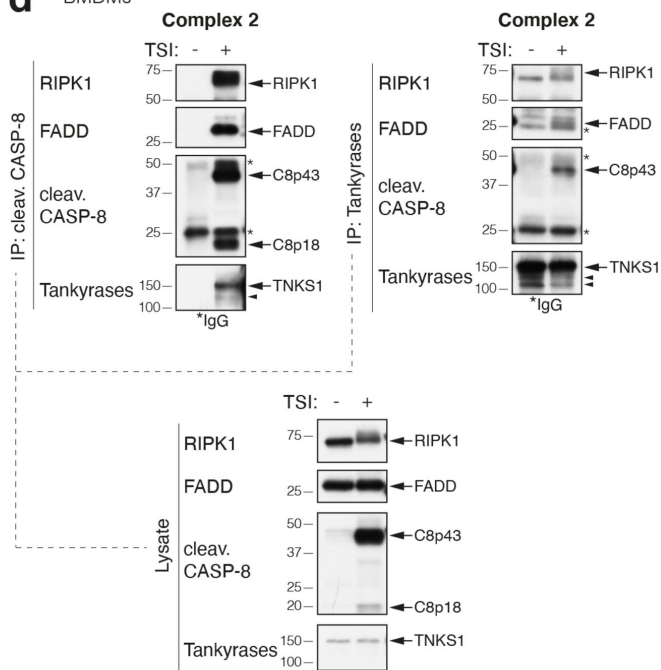

# Fig. 2

**a**

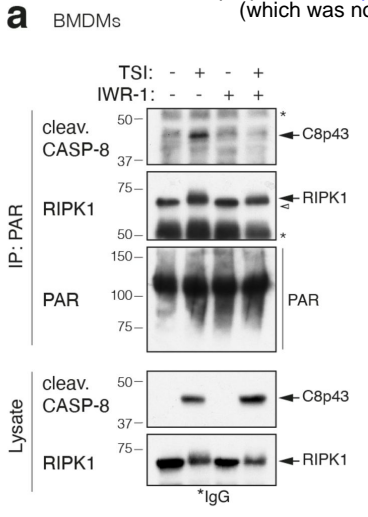

**b**

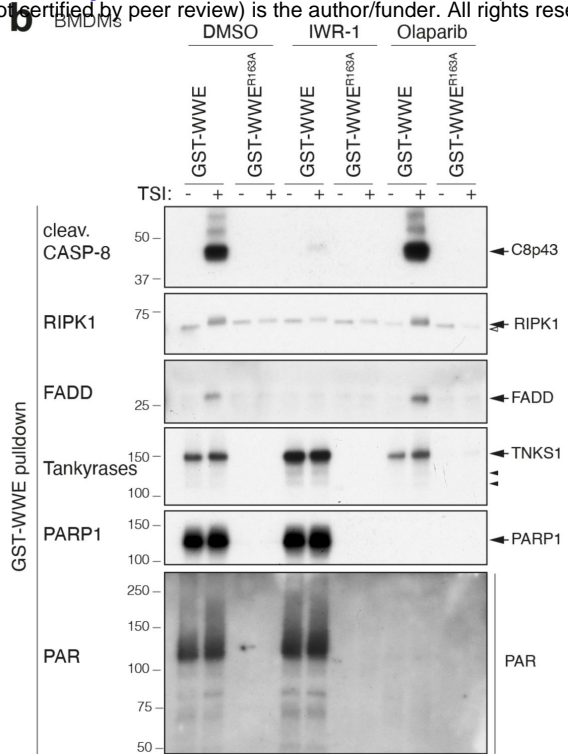

**c**

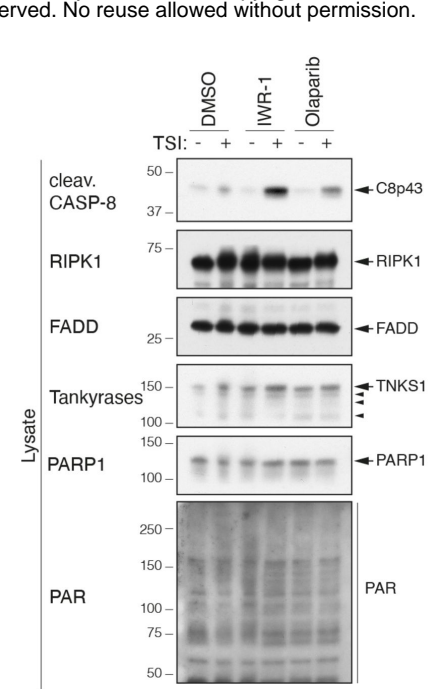

**c**

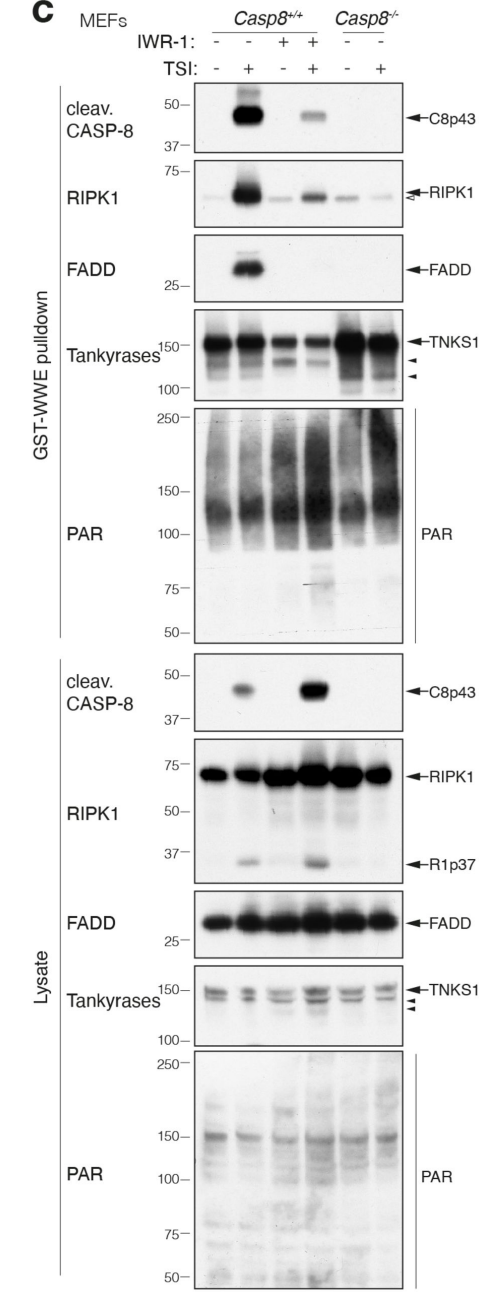

**d**

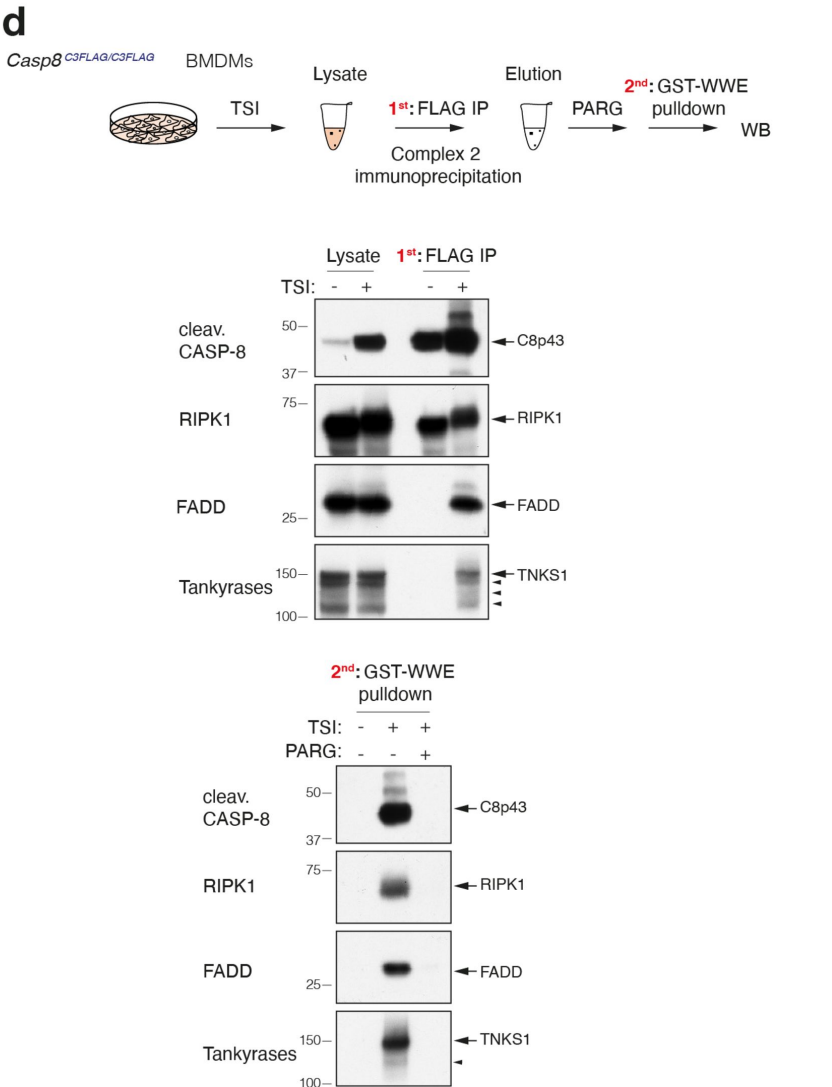



**Fig. 3****a**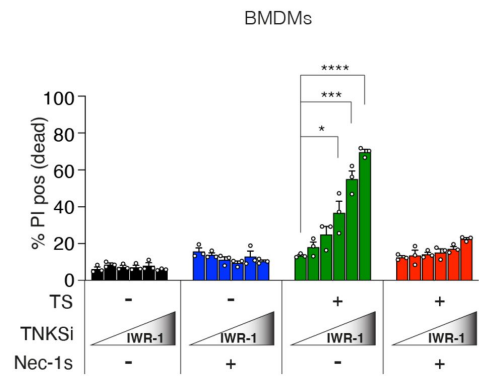**b**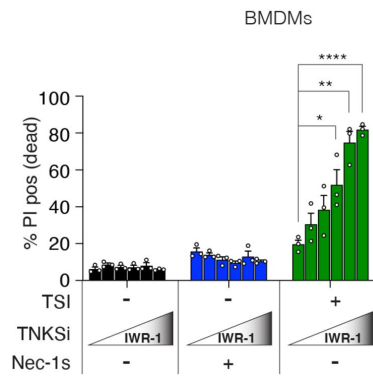**e**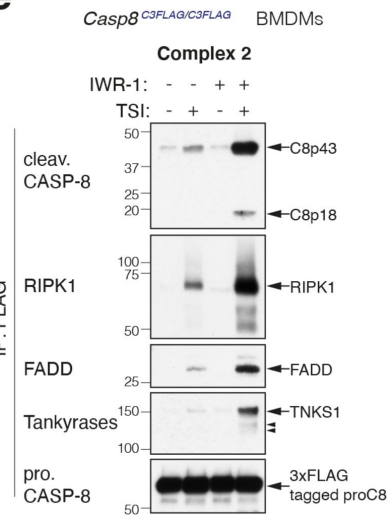**c**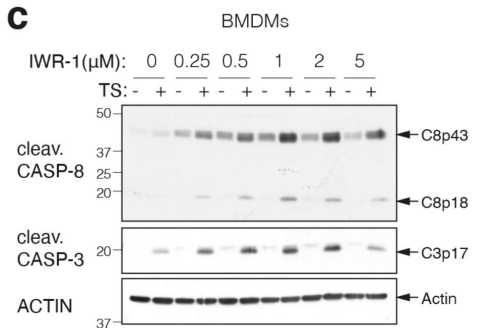**d**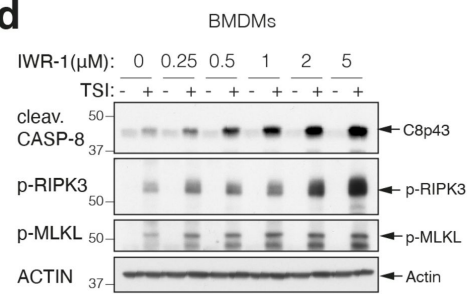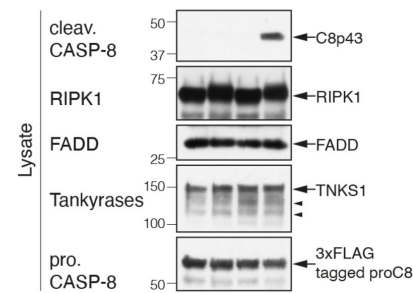**f** *Ripk1*<sup>D325A/+</sup> MDFs #856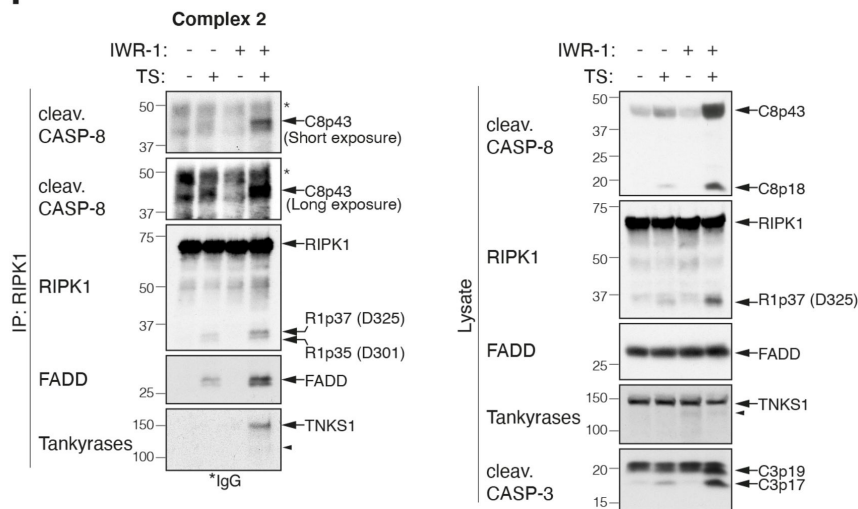**g** *Ripk1*<sup>D325A/+</sup> MDFs #856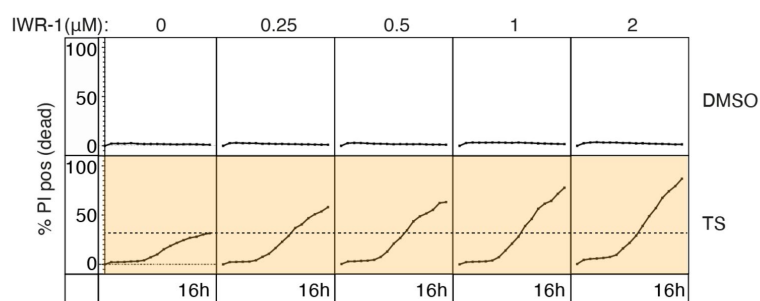



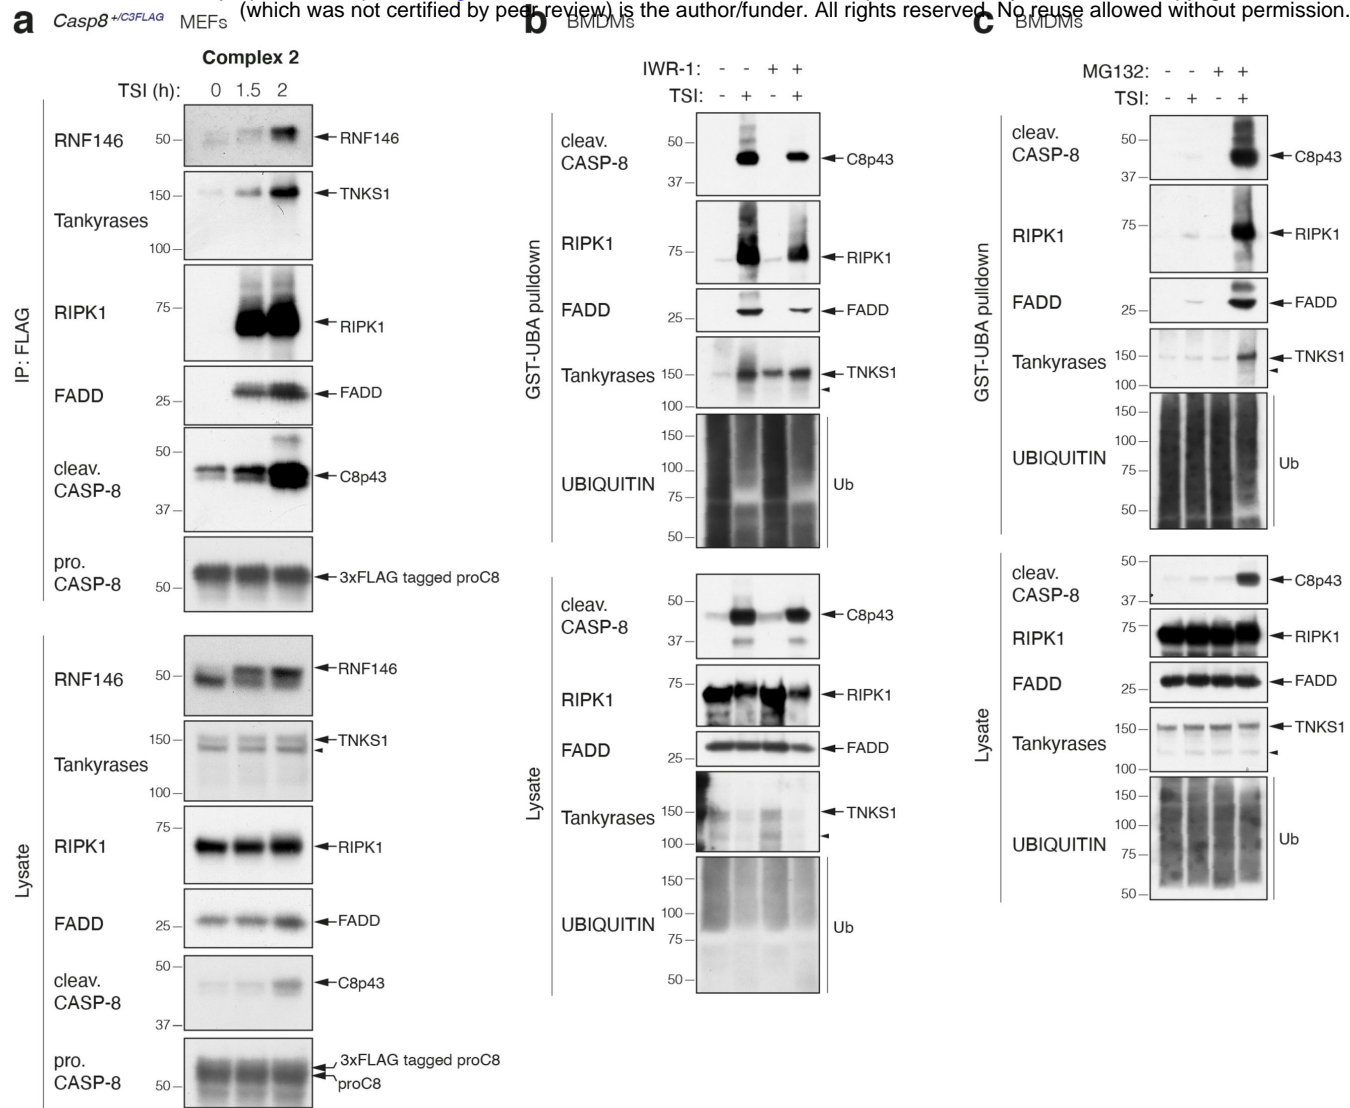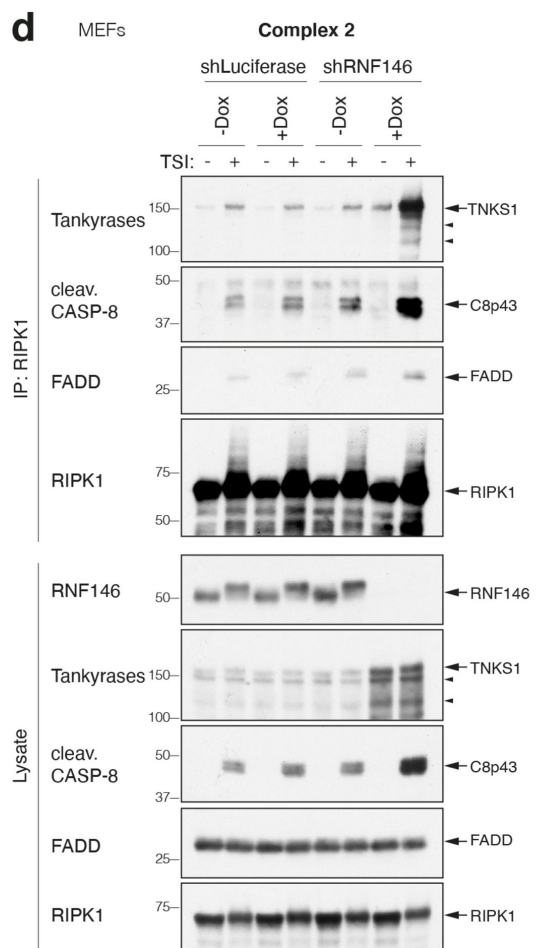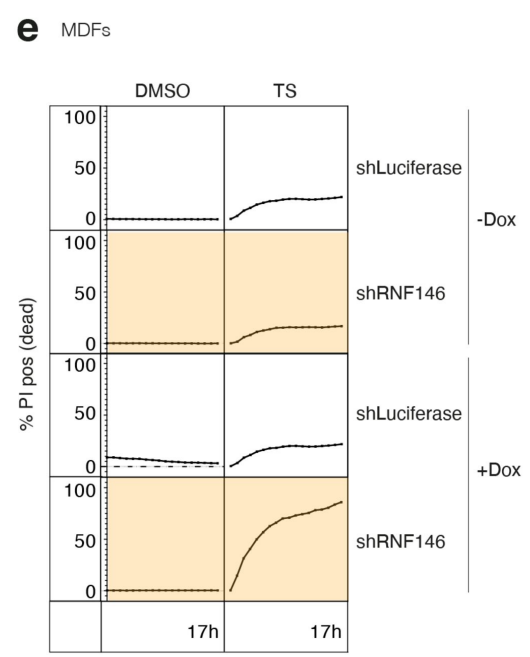

# Fig. 5

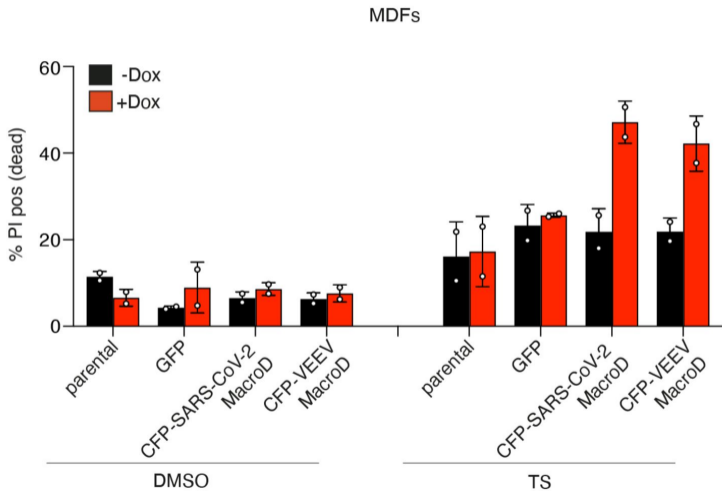

# Extended Data Fig. 1

bioRxiv preprint doi: <https://doi.org/10.1101/2021.02.09.430424>; this version posted February 9, 2021. The copyright holder for this preprint (which was not certified by peer review) is the author/funder. All rights reserved. No reuse allowed without permission.

**a**

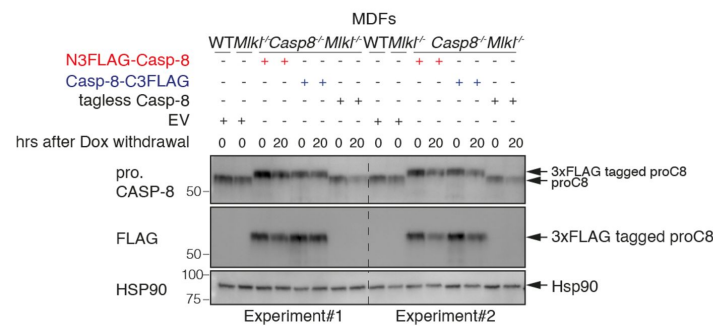

**b**

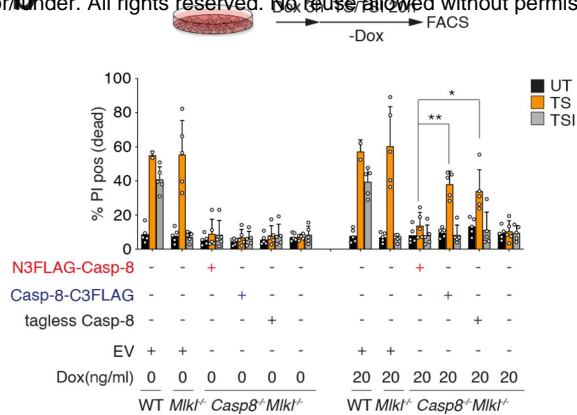

**c**

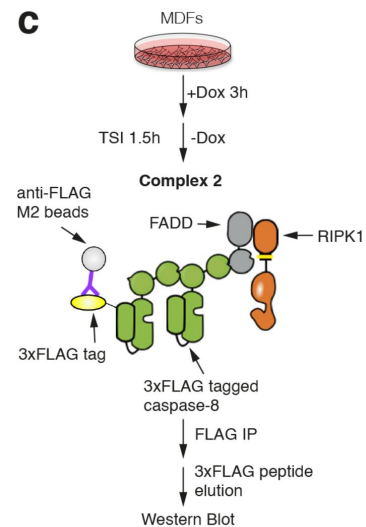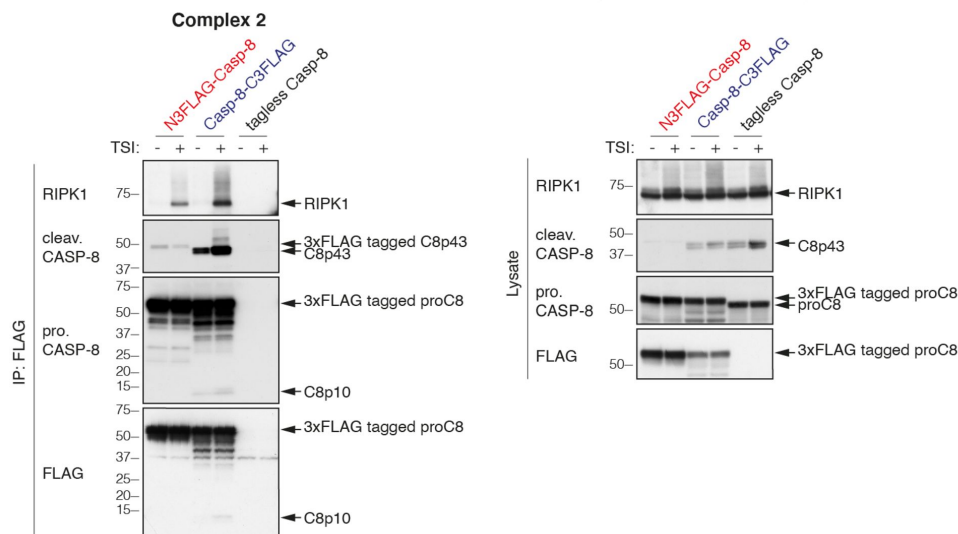

**d**

**Tankyrase-1 isoform 1**  
(ARTD5/PARP5a/PARP5/TNKS1/TNKS)

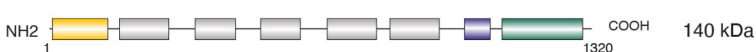

**Tankyrase-1 isoform 2**

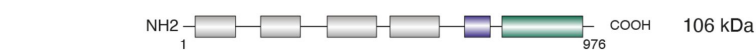

**Tankyrase-2**  
(ARTD6/PARP5b/PARP6/TNKS2)

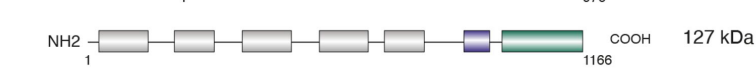

Legend: HPS (yellow), ARD (grey), SAM (purple), ART (green)

**e**

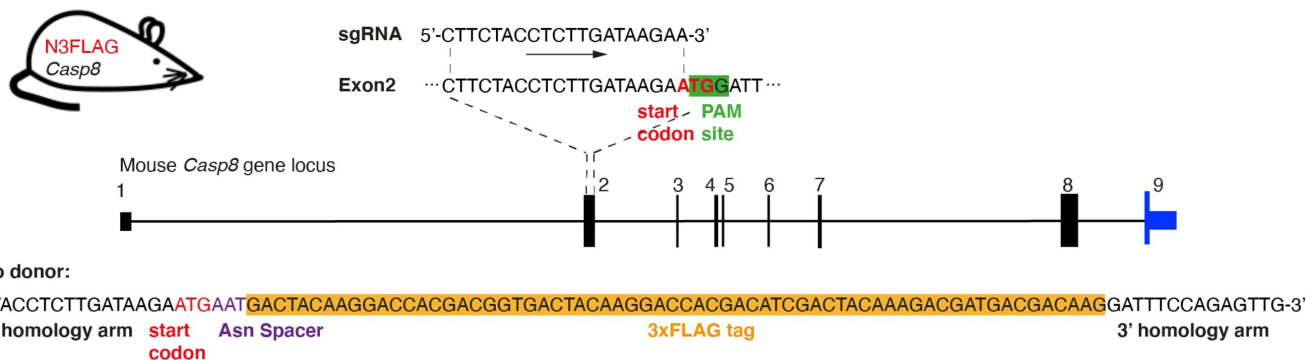

**f**

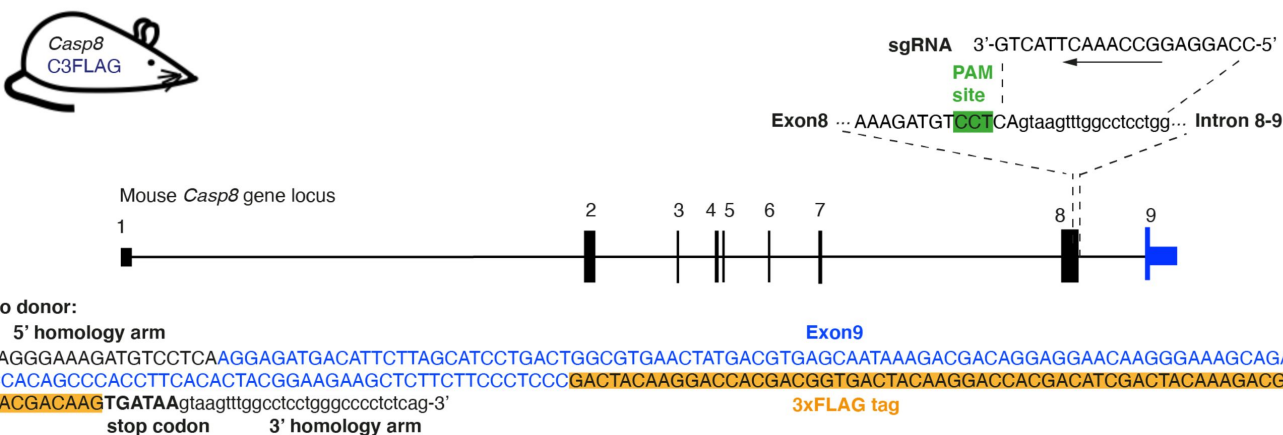

# Extended Data Fig. 1

bioRxiv preprint doi: <https://doi.org/10.1101/2021.02.09.430424>; this version posted February 9, 2021. The copyright holder for this preprint (which was not certified by peer review) is the author/funder. All rights reserved. No reuse allowed without permission.

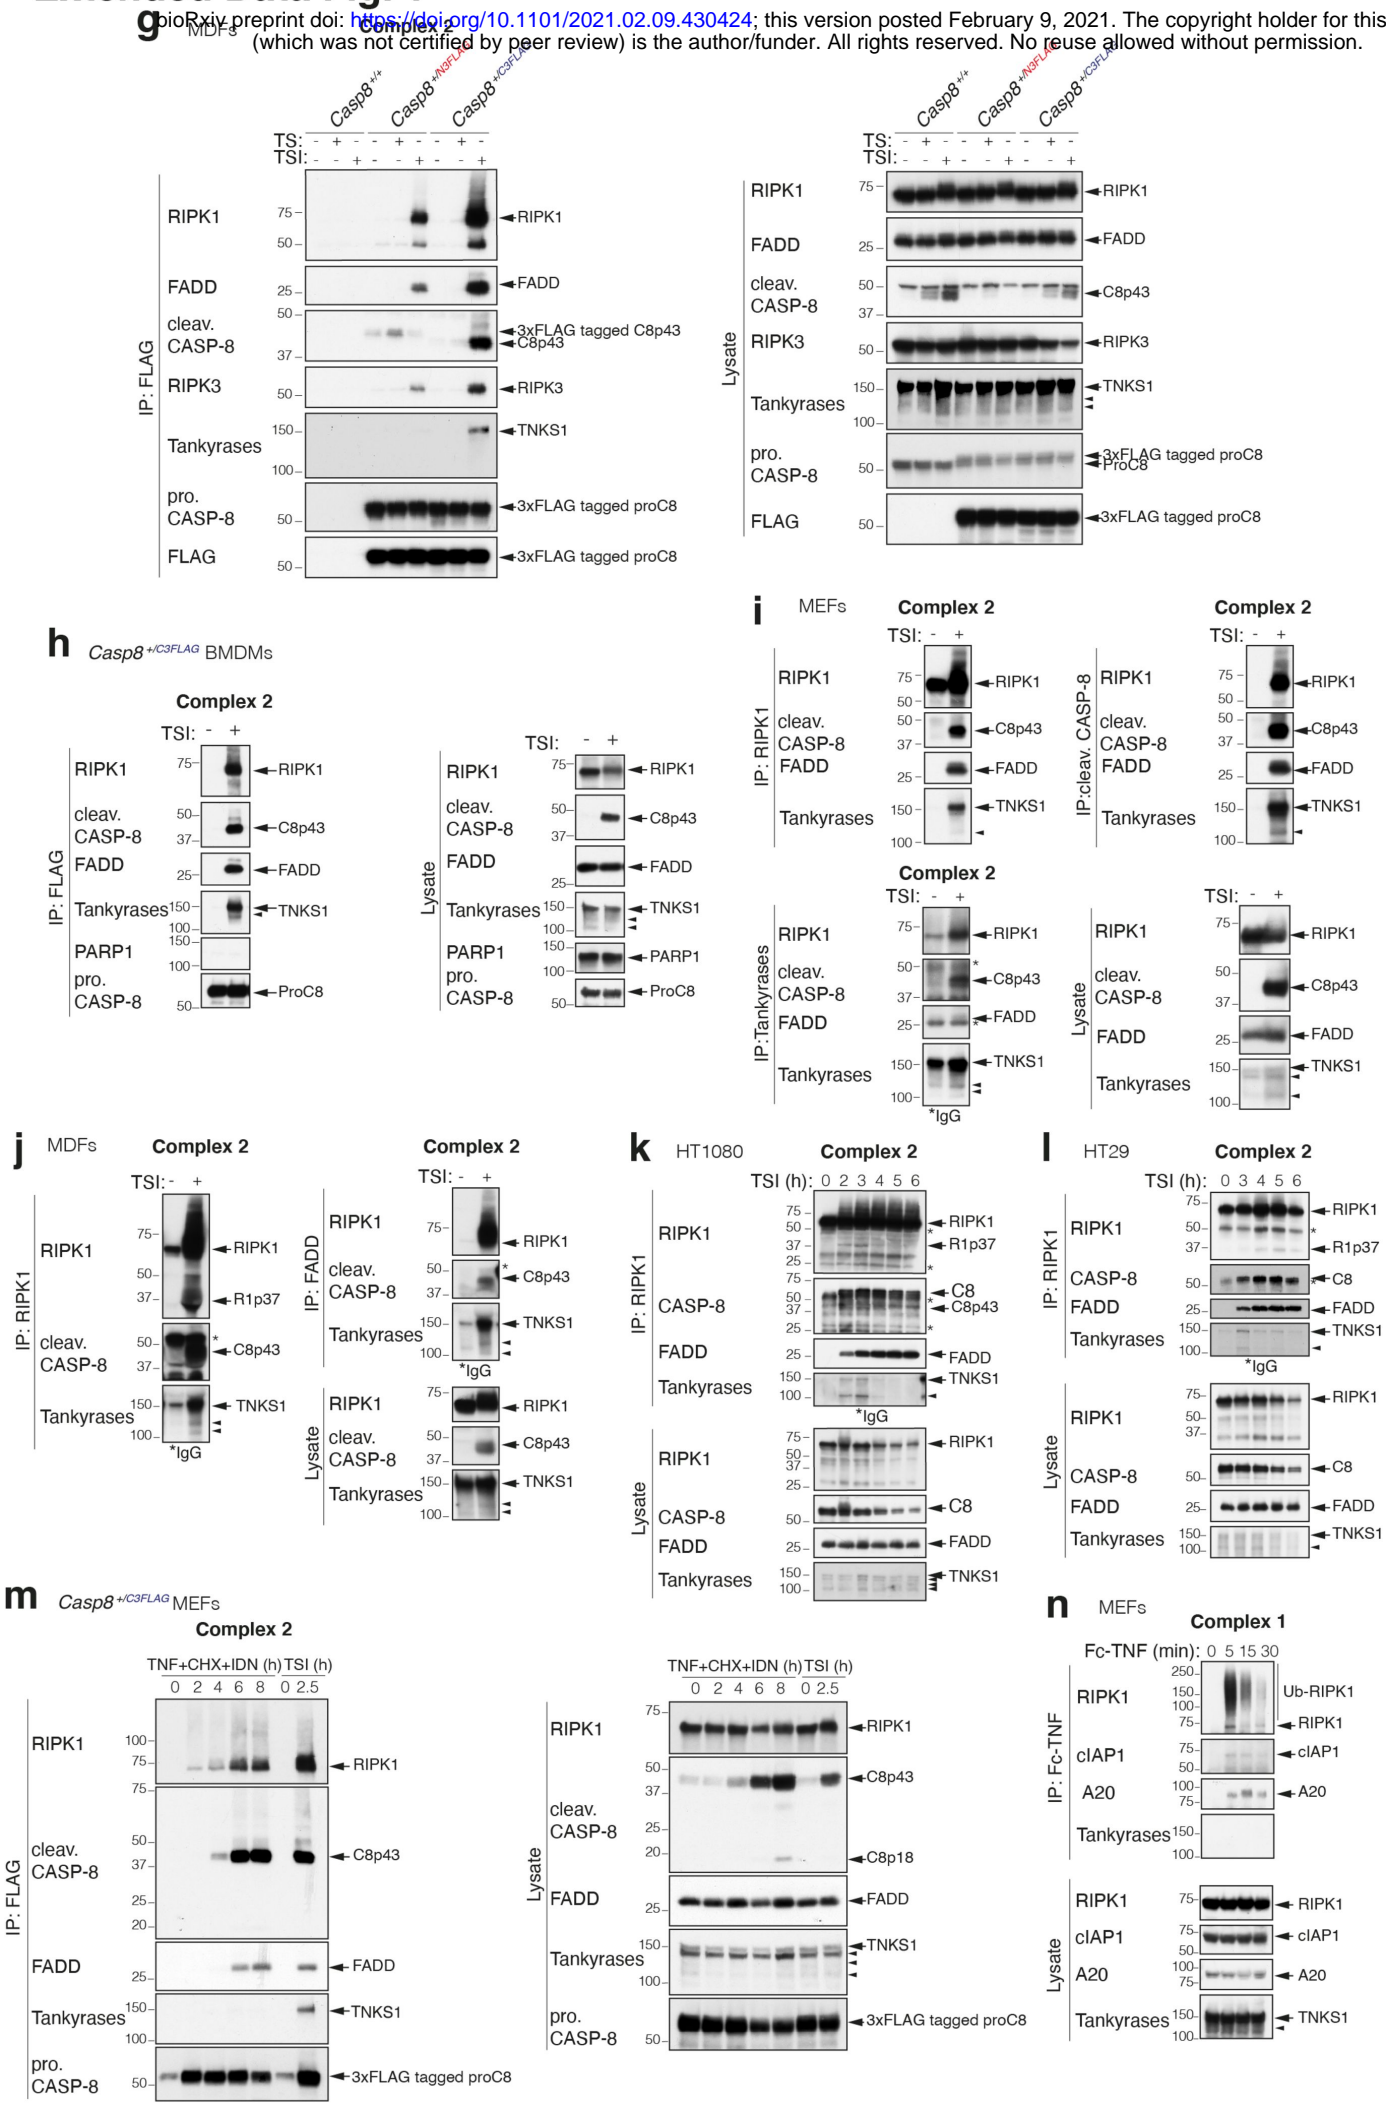



# Extended Data Fig. 2

bioRxiv preprint doi: <https://doi.org/10.1101/2021.02.09.430424>; this version posted February 9, 2021. The copyright holder for this preprint (which was not certified by peer review) is the author/funder. All rights reserved. No reuse allowed without permission.

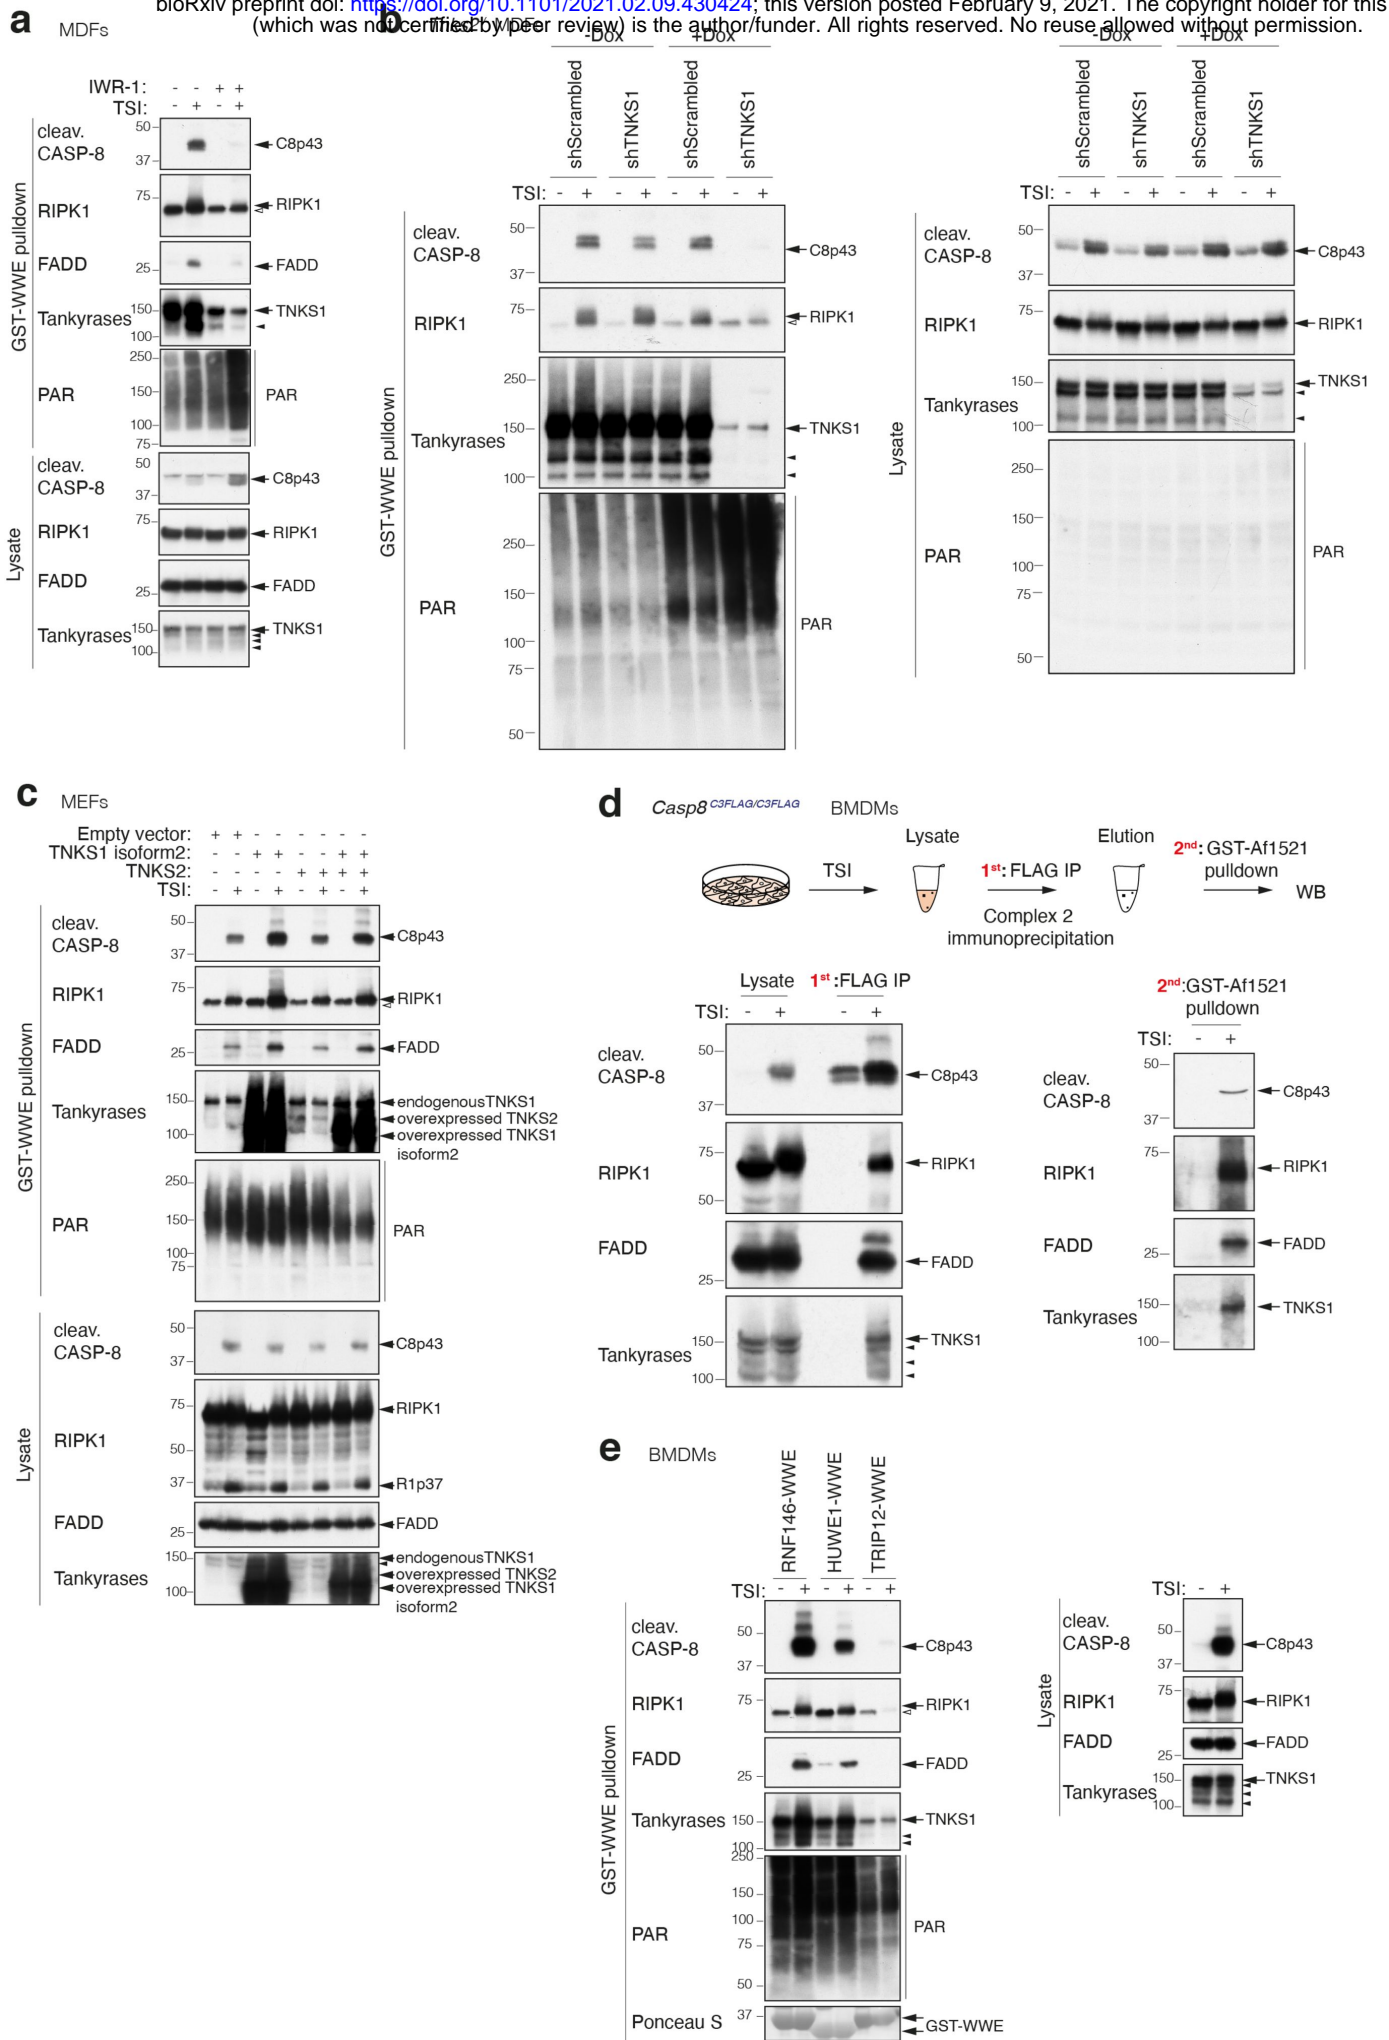

# Extended Data Fig. 3

**a** bioRxiv preprint doi: <https://doi.org/10.1101/2021.02.09.430424>; this version posted February 9, 2021. The copyright holder for this preprint (which was not certified by peer review) is the author/funder. All rights reserved. No reuse allowed without permission.

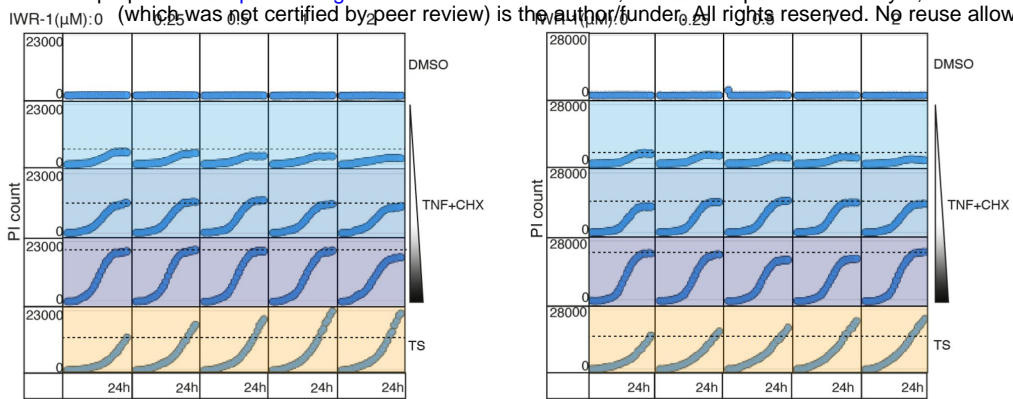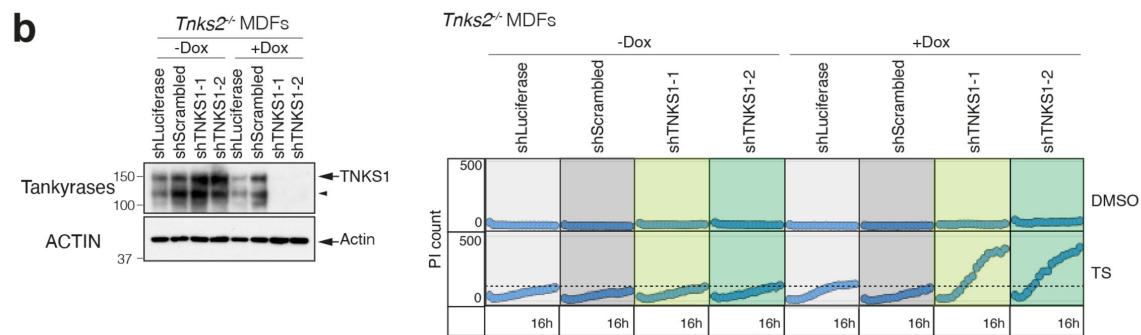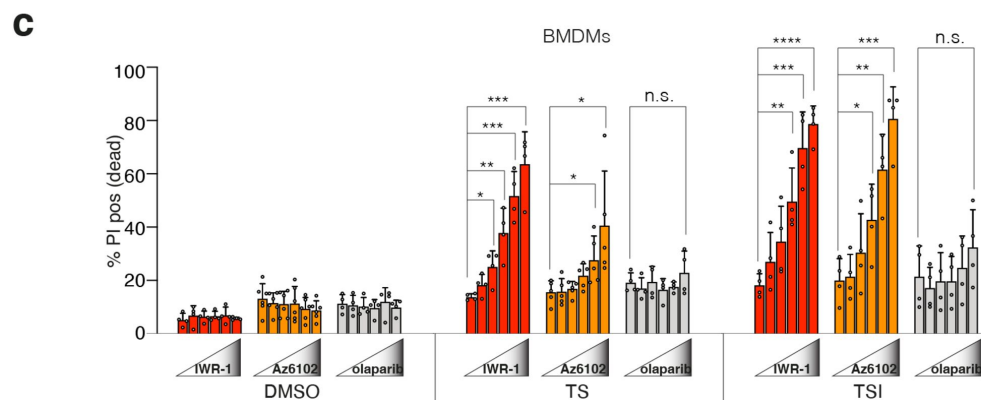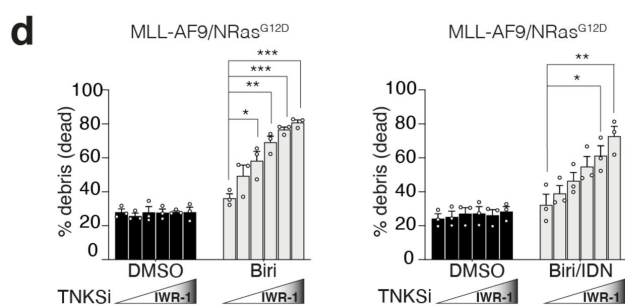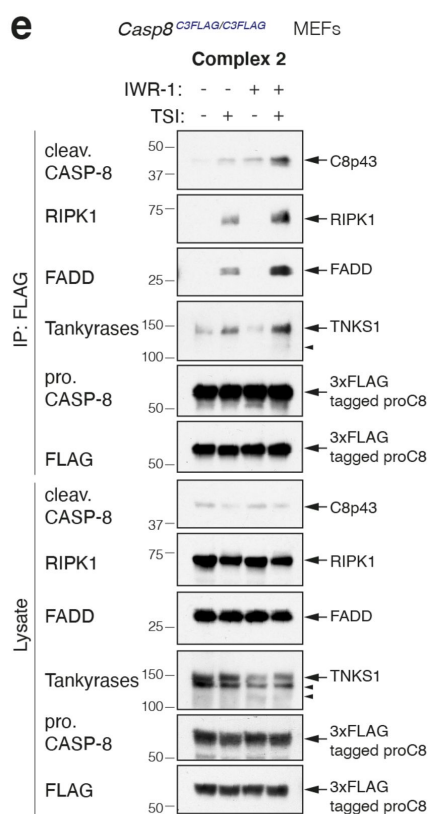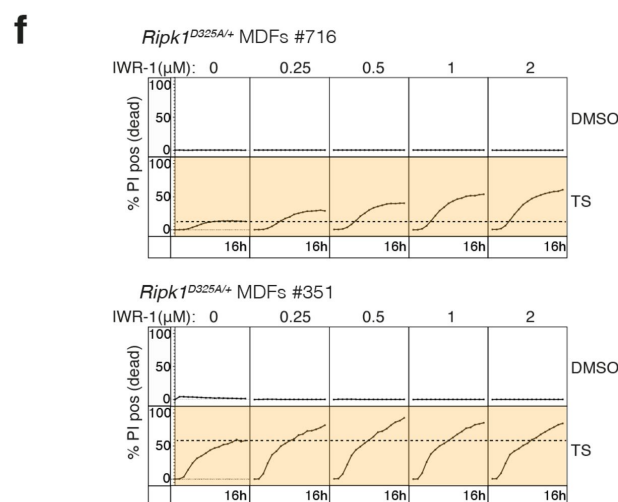



# Extended Data Fig. 4

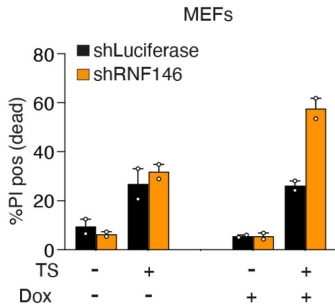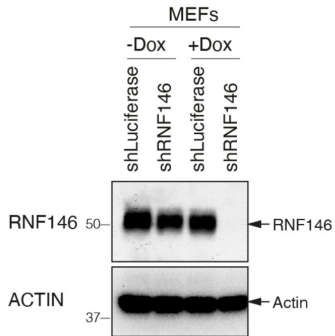

Source: https://www.biorxiv.org/content/biorxiv/early/2021/02/09/2021.02.09.430424.full.pdf
